# Supplementary material for: 2-(2-Phenylethyl)chromone Derivatives of Agarwood Originating from Gyrinops salicifolia
Source: MDPI journal article supplement (doi:10.3390/molecules21101313), 2016-10-03
Supplement: s1 [file s1]

# Supplementary Materials: 2-(2-Phenylethyl)chromone Derivatives of Agarwood Originating from *Gyrinops salicifolia*

Hang Shao, Wen-Li Mei, Wen-Hua Dong, Cui-Juan Gai, Wei Li, Guo-Peng Zhu and Hao-Fu Dai

## Contents

- Figure S1.**  $^1\text{H}$ -NMR spectrum (500 MHz) of compound **1** in DMSO.
- Figure S2.**  $^{13}\text{C}$ -NMR spectrum (125 MHz) of compound **1** in DMSO.
- Figure S3.**  $^1\text{H}$ - $^1\text{H}$  COSY spectrum (500 MHz) of compound **1** in DMSO.
- Figure S4.** HSQC spectrum (500 MHz) of compound **1** in DMSO.
- Figure S5.** HMBC spectrum (500 MHz) of compound **1** in DMSO.
- Figure S6.** ROESY spectrum (400 MHz) of compound **1** in DMSO.
- Figure S7.** ESI(+)-MS spectrum of compound **1**.
- Figure S8.** HRESI(+)-MS spectrum of compound **1**.
- Figure S9.**  $^1\text{H}$ -NMR spectrum (500 MHz) of compound **2** in DMSO.
- Figure S10.**  $^{13}\text{C}$ -NMR spectrum (125 MHz) of compound **2** in DMSO.
- Figure S11.**  $^1\text{H}$ - $^1\text{H}$  COSY spectrum (500 MHz) of compound **2** in DMSO.
- Figure S12.** HSQC spectrum (500 MHz) of compound **2** in DMSO.
- Figure S13.** HMBC spectrum (500 MHz) of compound **2** in DMSO.
- Figure S14.** ROESY spectrum (400 MHz) of compound **2** in DMSO.
- Figure S15.** ESI(+)-MS spectrum of compound **2**.
- Figure S16.** HRESI(+)-MS spectrum of compound **2**.
- Figure S17.**  $^1\text{H}$ -NMR spectrum (500 MHz) of compound **3** in DMSO.
- Figure S18.**  $^{13}\text{C}$ -NMR spectrum (125 MHz) of compound **3** in DMSO.
- Figure S19.**  $^1\text{H}$ - $^1\text{H}$  COSY spectrum (500 MHz) of compound **3** in DMSO.
- Figure S20.** HSQC spectrum (500 MHz) of compound **3** in DMSO.
- Figure S21.** HMBC spectrum (500 MHz) of compound **3** in DMSO.
- Figure S22.** ROESY spectrum (400 MHz) of compound **3** in DMSO.
- Figure S23.** ESI(+)-MS spectrum of compound **3**.
- Figure S24.** HRESI(+)-MS spectrum of compound **3**.
- Figure S25.**  $^1\text{H}$ -NMR spectrum (500 MHz) of compound **4** in  $\text{CDCl}_3$ .
- Figure S26.**  $^{13}\text{C}$ -NMR spectrum (125 MHz) of compound **4** in  $\text{CDCl}_3$ .
- Figure S27.**  $^1\text{H}$ - $^1\text{H}$  COSY spectrum (500 MHz) of compound **4** in  $\text{CDCl}_3$ .
- Figure S28.** HSQC spectrum (500 MHz) of compound **4** in  $\text{CDCl}_3$ .
- Figure S29.** HMBC spectrum (500 MHz) of compound **4** in  $\text{CDCl}_3$ .
- Figure S30.** ROESY spectrum (400 MHz) of compound **4** in  $\text{CDCl}_3$ .
- Figure S31.** ESI(+)-MS spectrum of compound **4**.
- Figure S32.** HRESI(+)-MS spectrum of compound **4**.

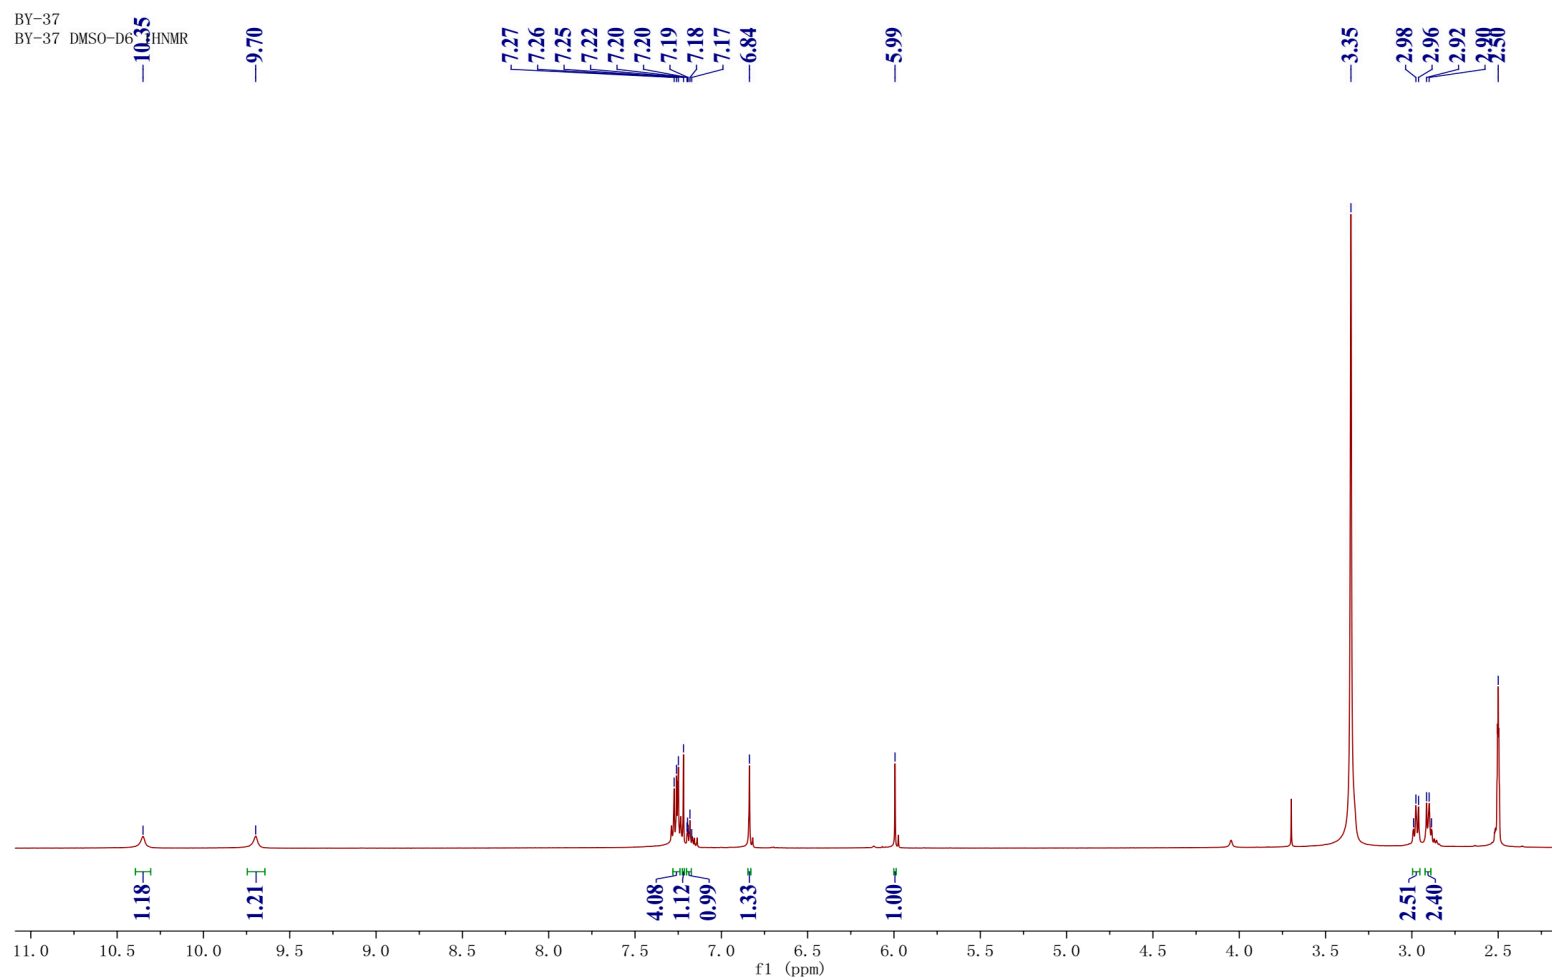

**Figure S1.** <sup>1</sup>H-NMR spectrum (500 MHz) of compound **1** in DMSO.

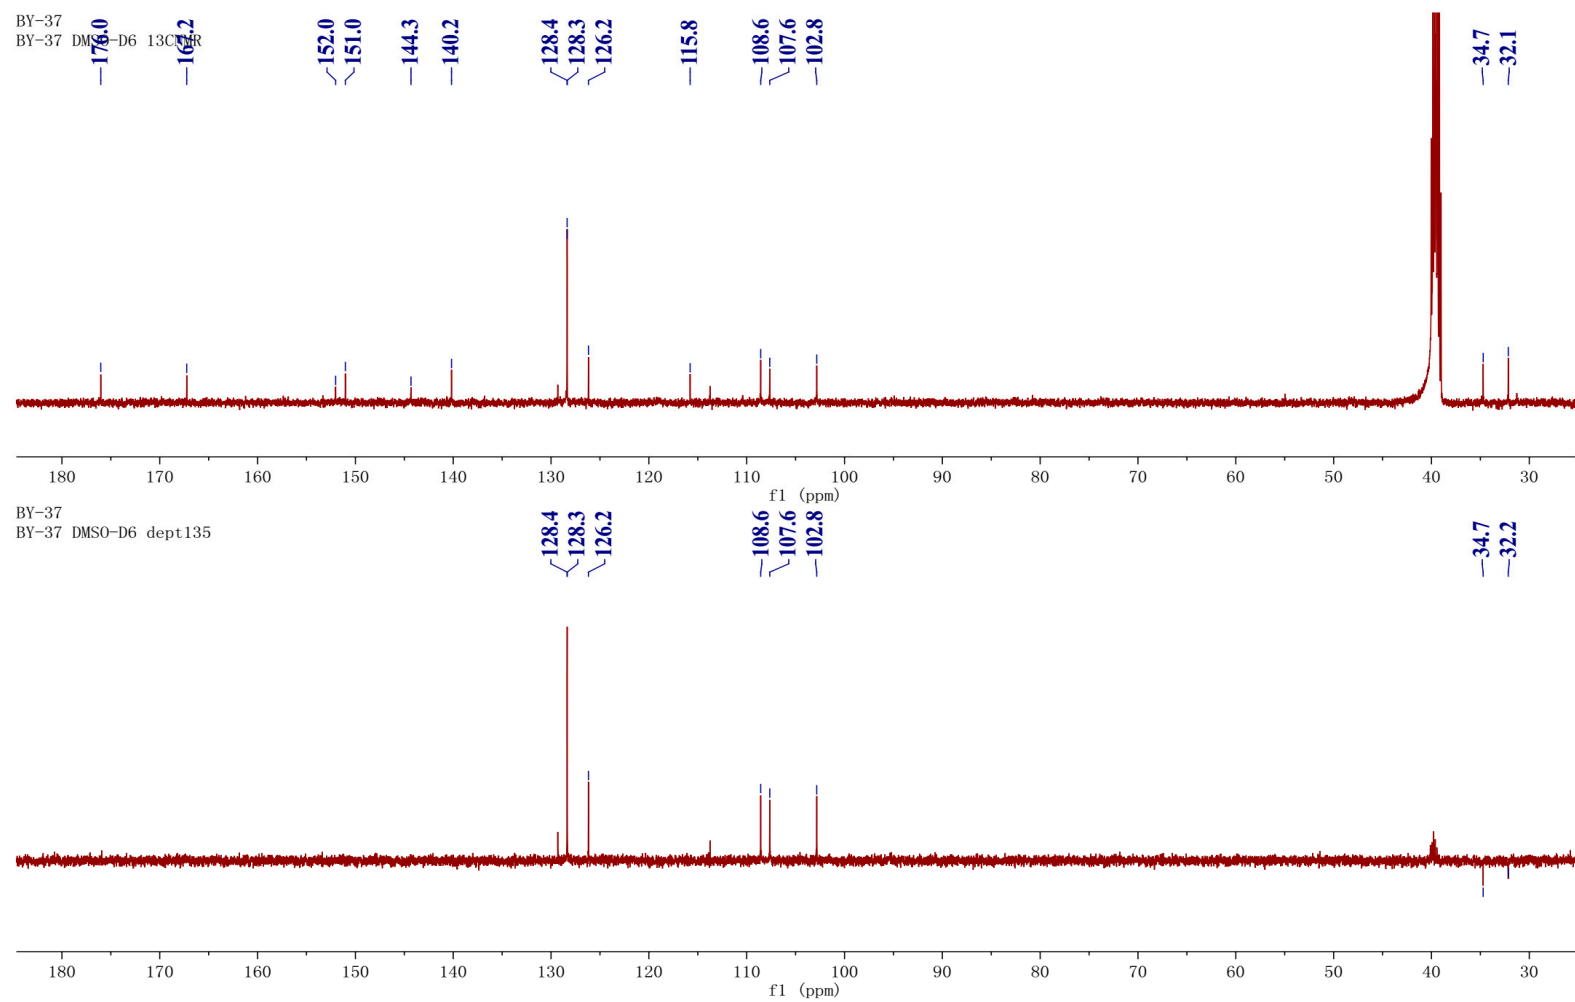

**Figure S2.**  $^{13}\text{C}$ -NMR spectrum (125 MHz) of compound **1** in DMSO.

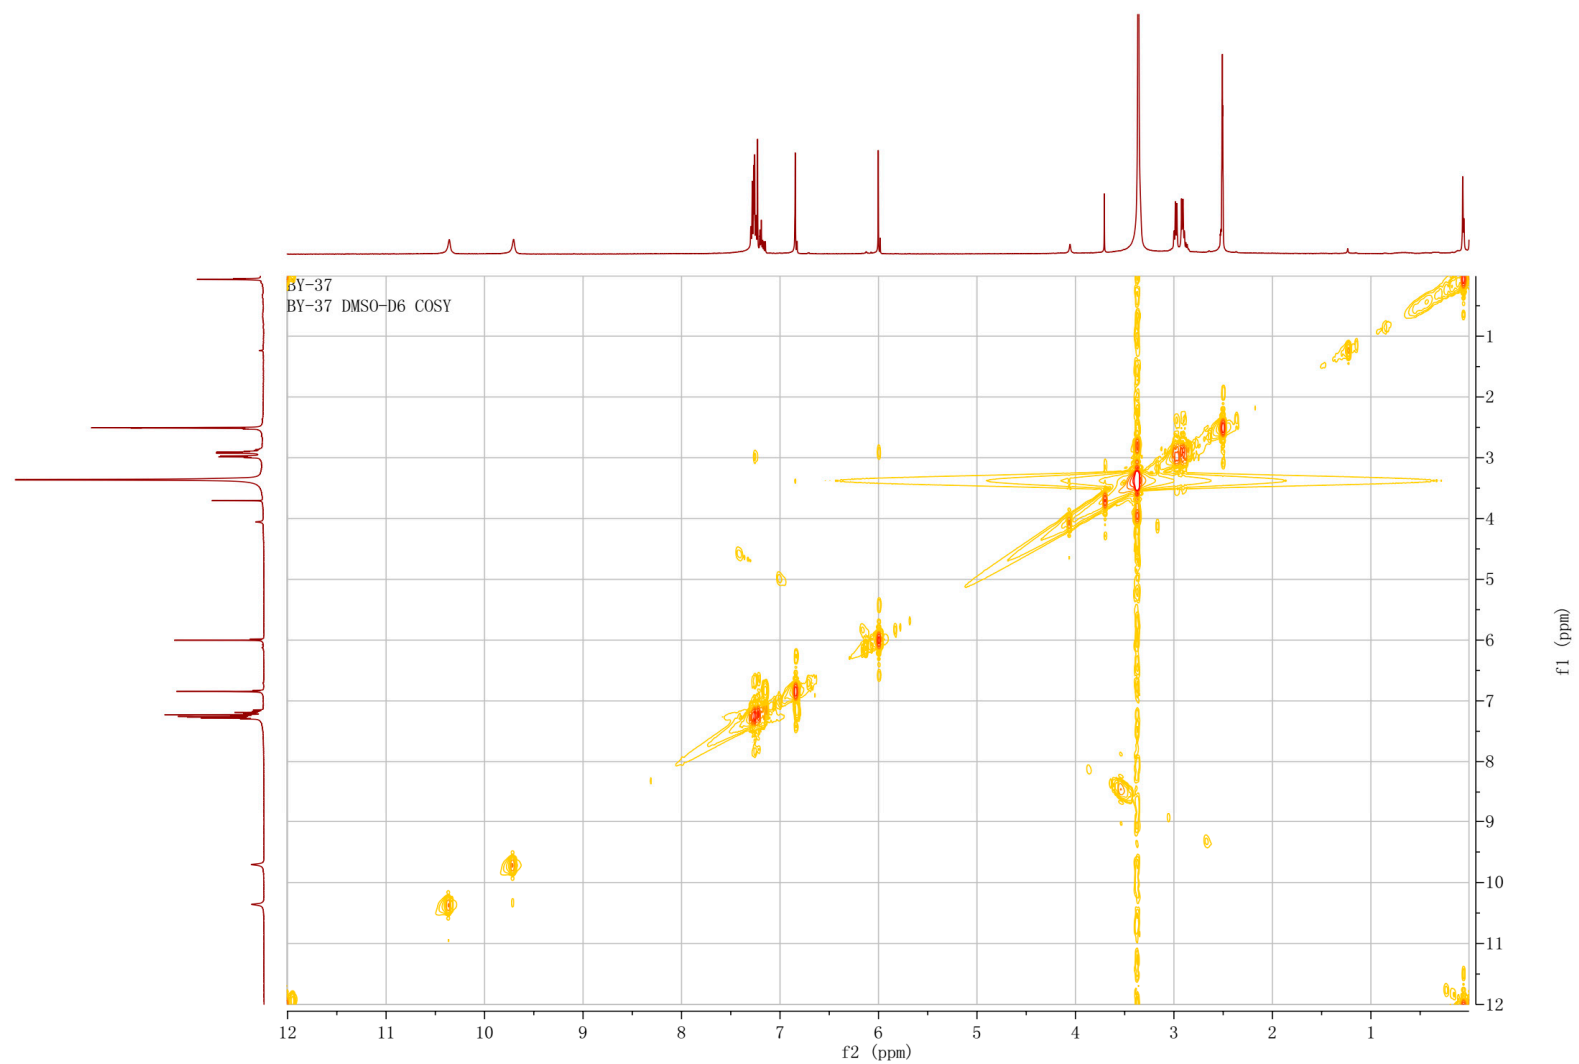

**Figure S3.**  $^1\text{H}$ - $^1\text{H}$  COSY spectrum (500 MHz) of compound 1 in DMSO.

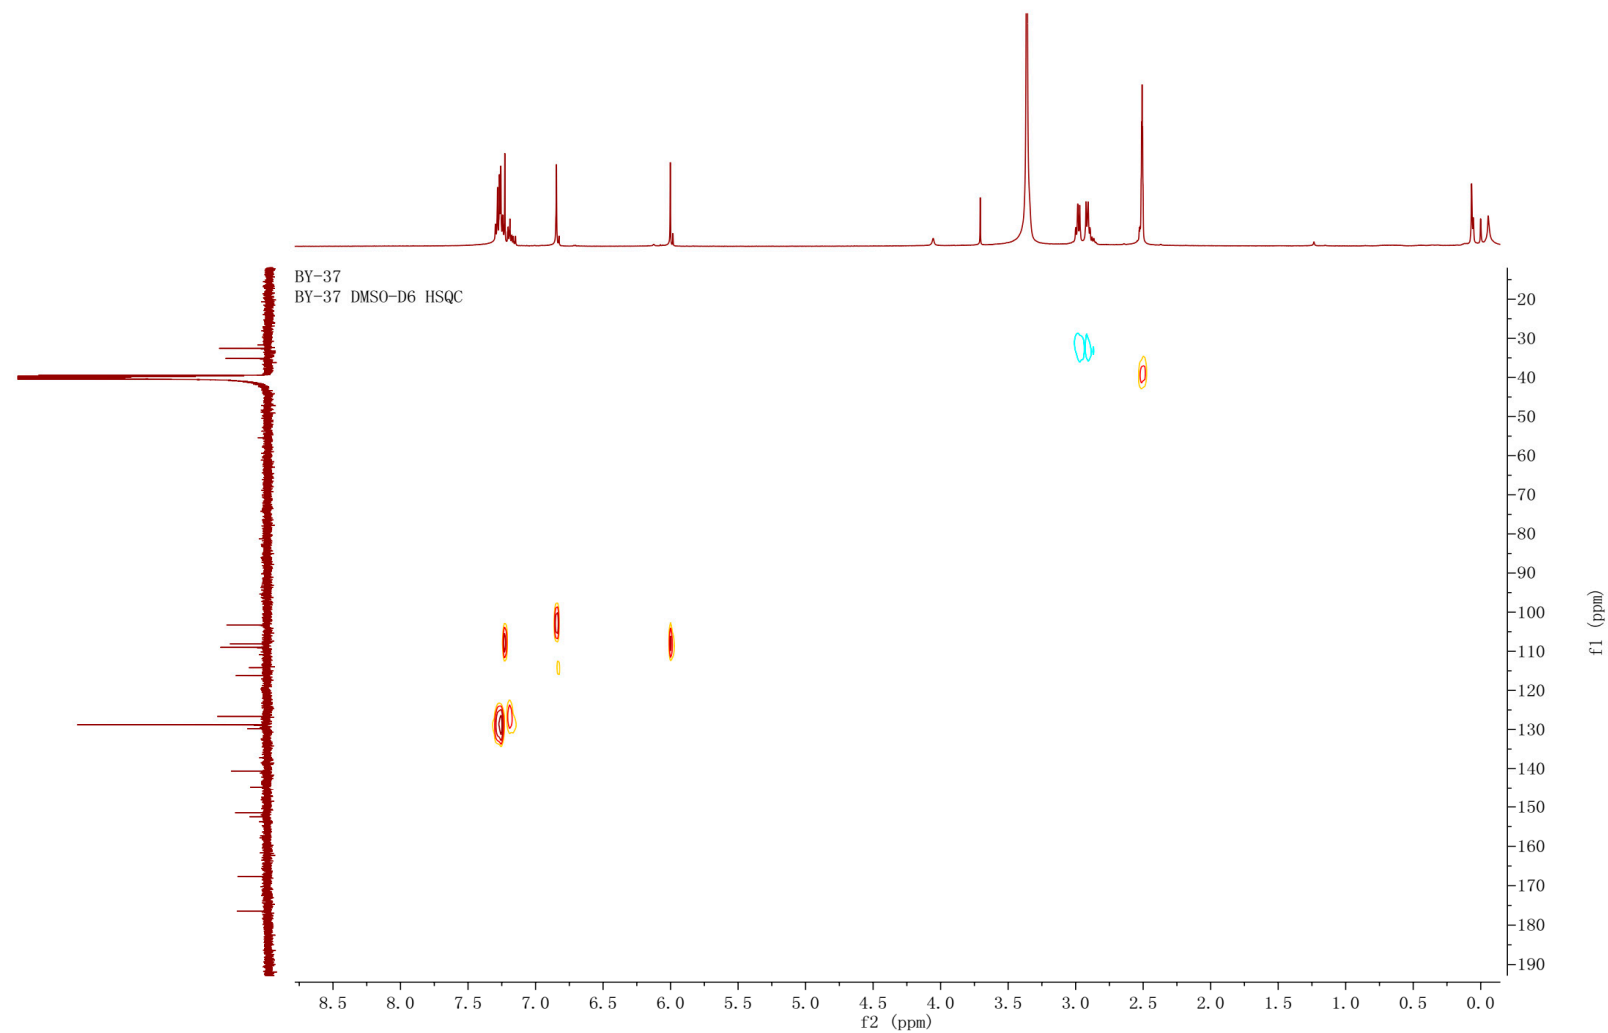

**Figure S4.** HSQC spectrum (500 MHz) of compound **1** in DMSO.

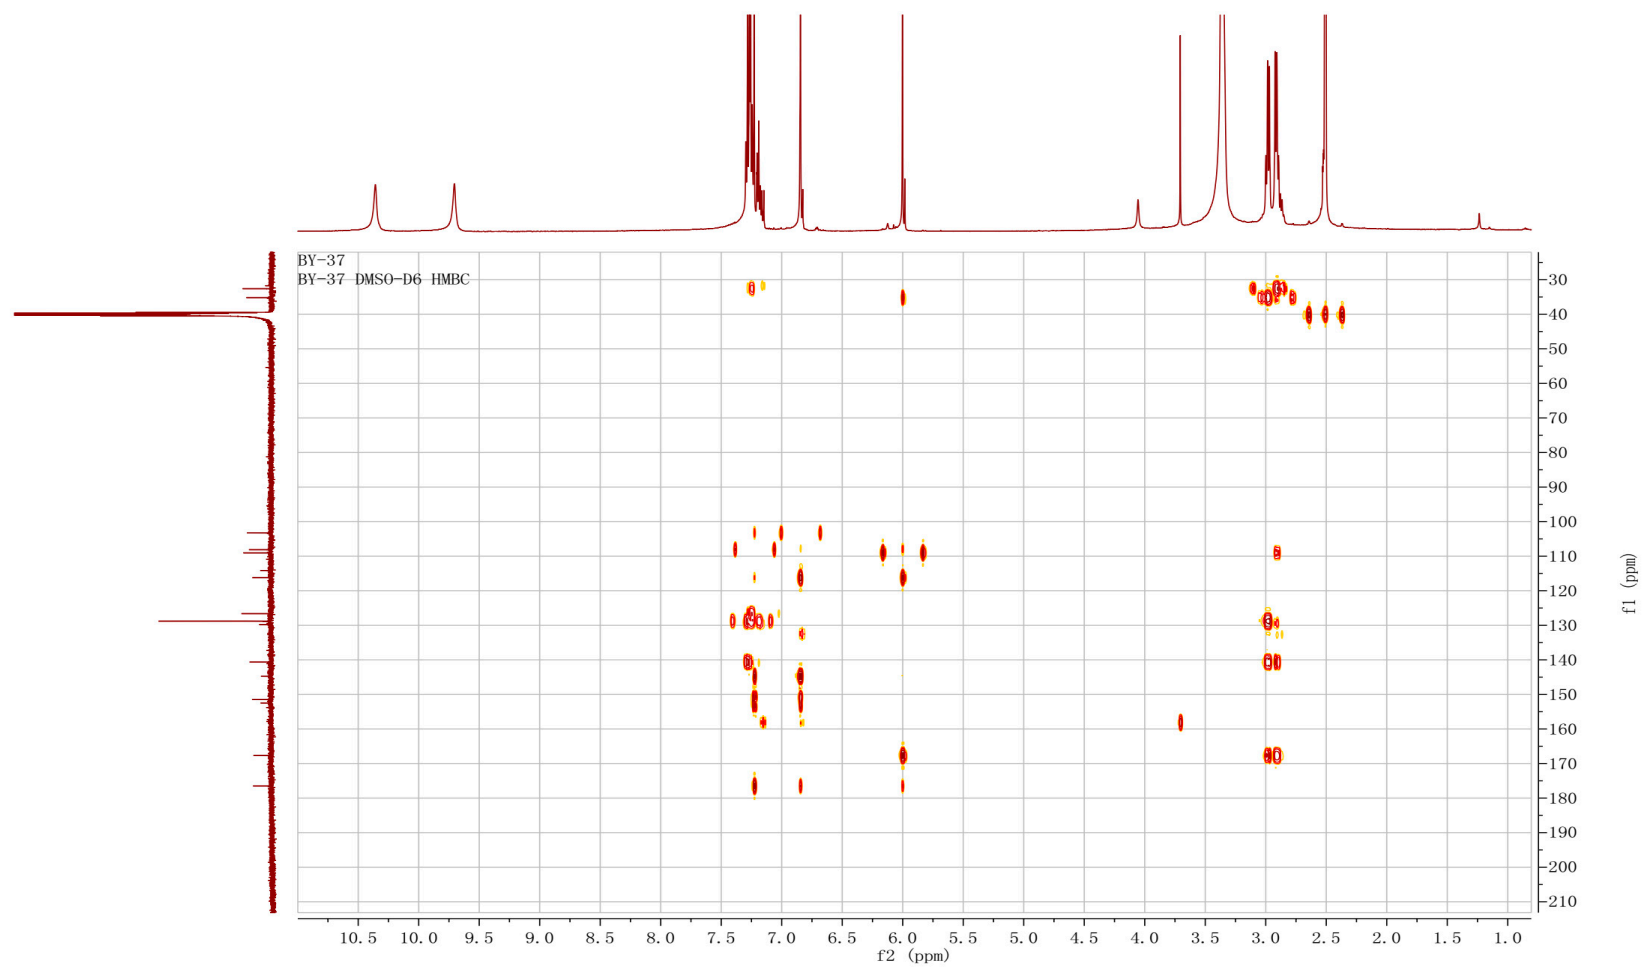

**Figure S5.** HMBC spectrum (500 MHz) of compound **1** in DMSO.

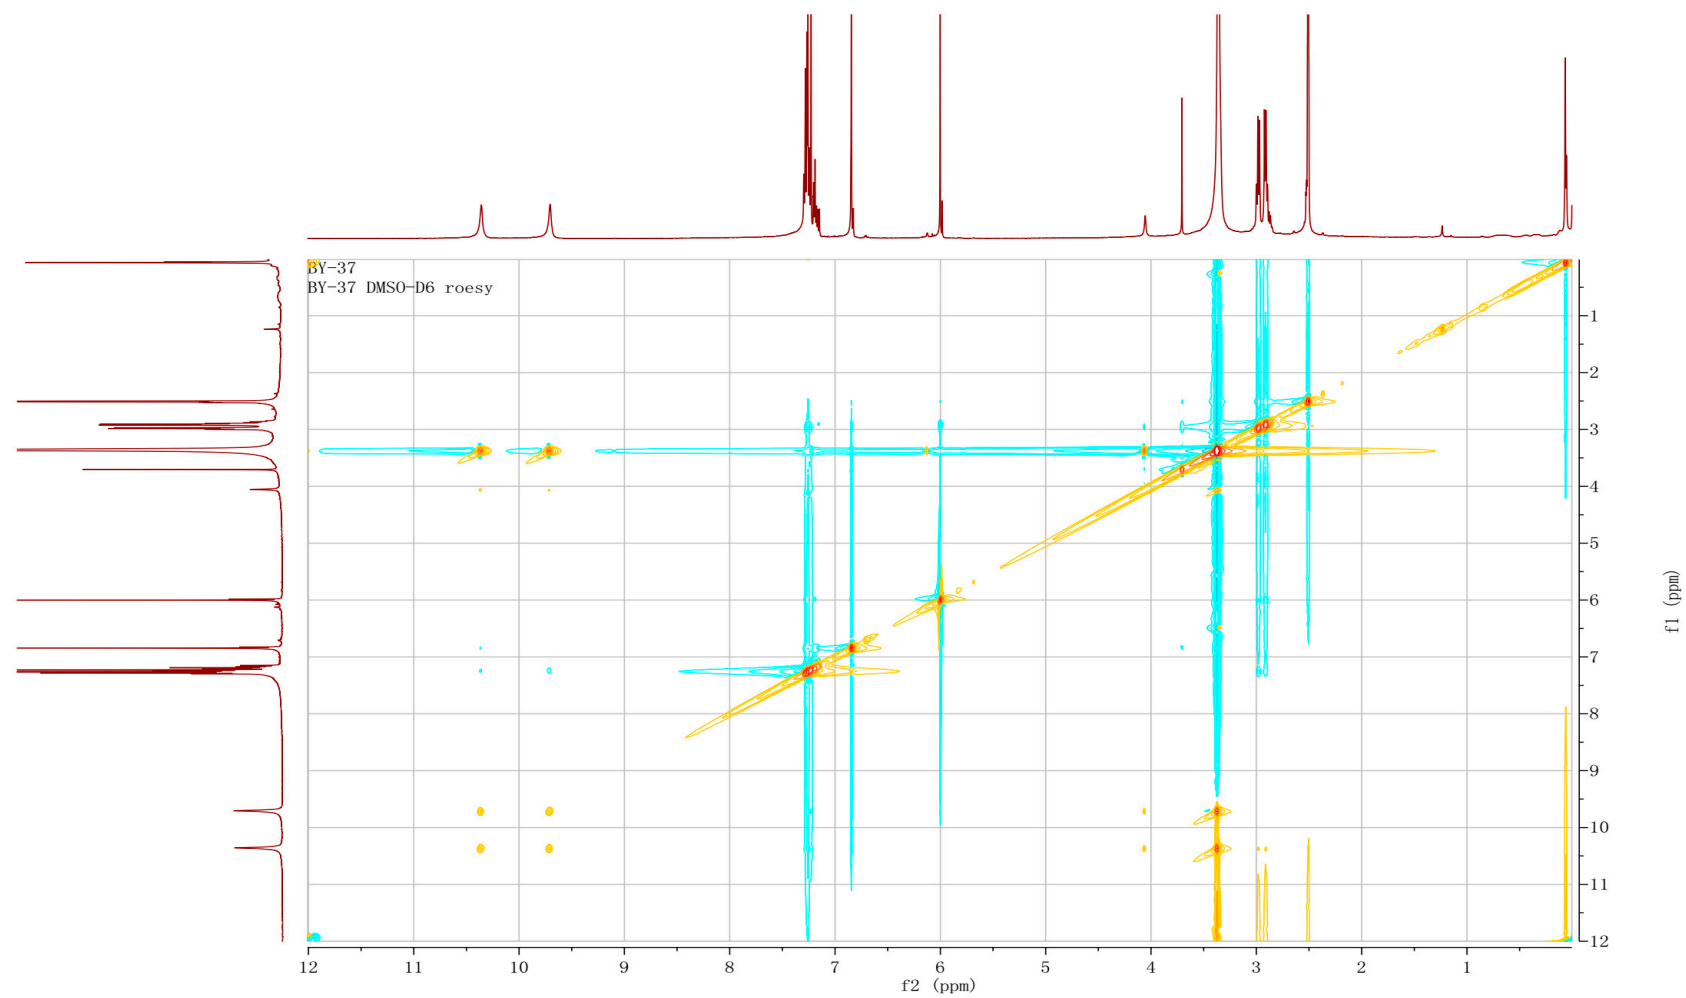

**Figure S6.** ROESY spectrum (400 MHz) of compound 1 in DMSO.

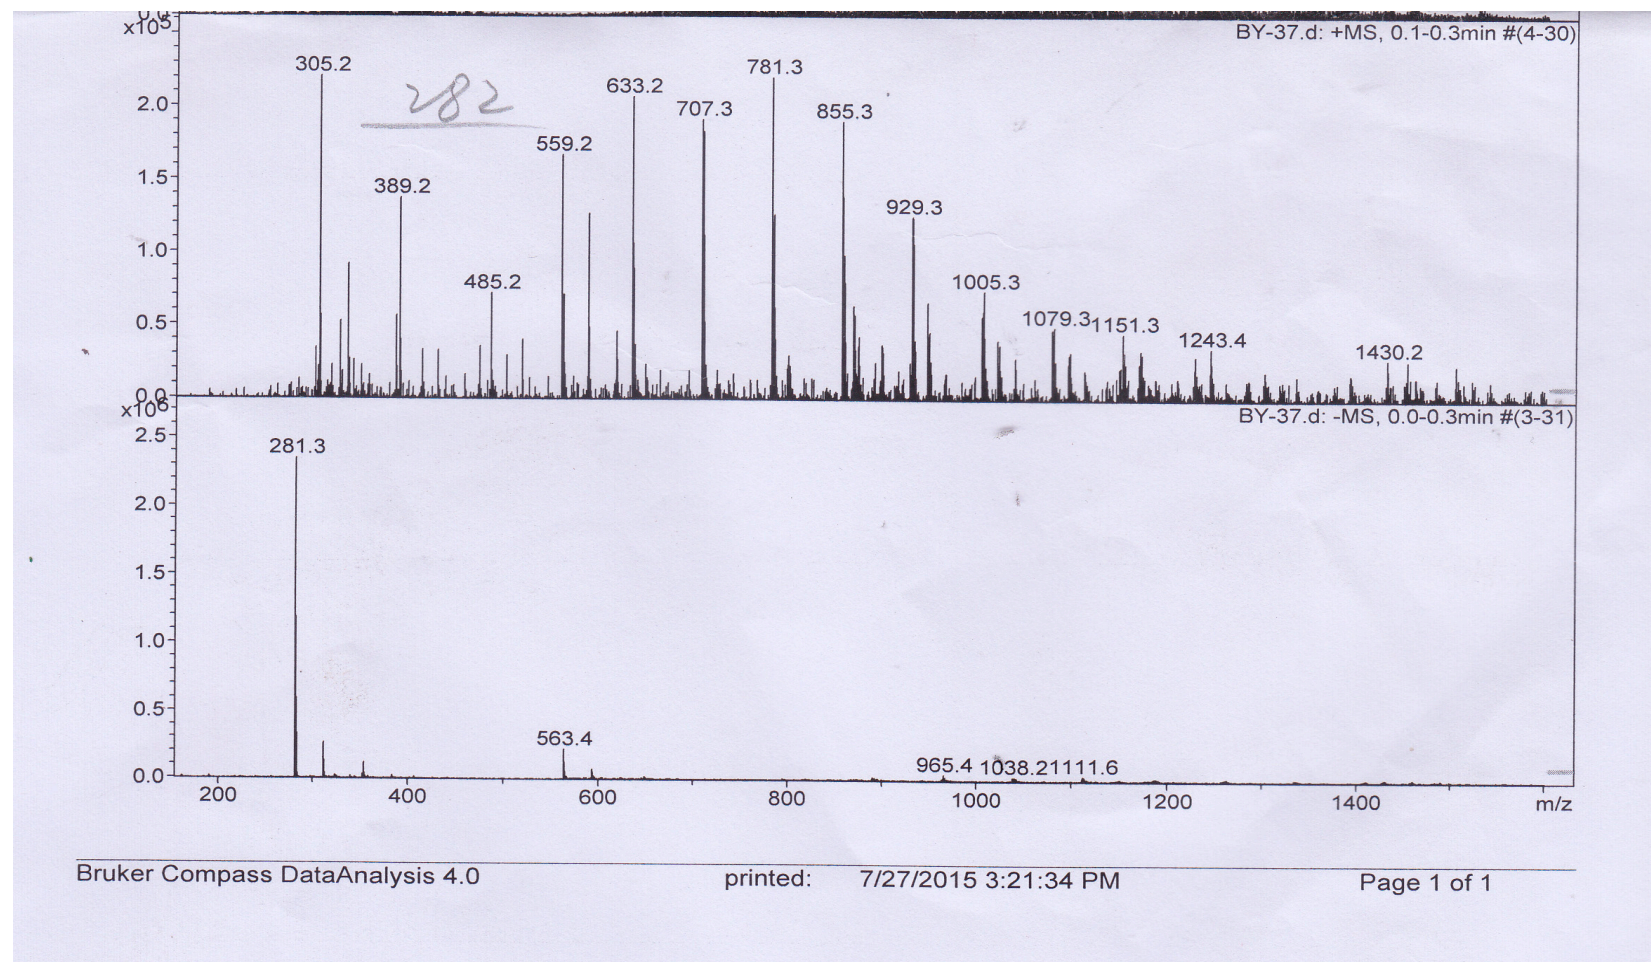

Figure S7. ESI(+)-MS spectrum of compound 1.

## Qualitative Analysis Report

|                               |              |                      |                       |
|-------------------------------|--------------|----------------------|-----------------------|
| <b>Data Filename</b>          | BY-37-.d     | <b>Sample Name</b>   | BY-37                 |
| <b>Sample Type</b>            | Sample       | <b>Position</b>      | P1-C1                 |
| <b>Instrument Name</b>        | Instrument 1 | <b>User Name</b>     |                       |
| <b>Acq Method</b>             | SIBU-ESI-i.m | <b>Acquired Time</b> | 10/22/2015 3:18:42 PM |
| <b>IRM Calibration Status</b> | Success      | <b>DA Method</b>     | ESI+.m                |
| <b>Comment</b>                |              |                      |                       |

|                       |                             |              |
|-----------------------|-----------------------------|--------------|
| <b>Sample Group</b>   |                             | <b>Info.</b> |
| <b>Acquisition SW</b> | 6200 series TOF/6500 series |              |
| <b>Version</b>        | Q-TOF B.05.01 (B5125.2)     |              |

### User Spectra

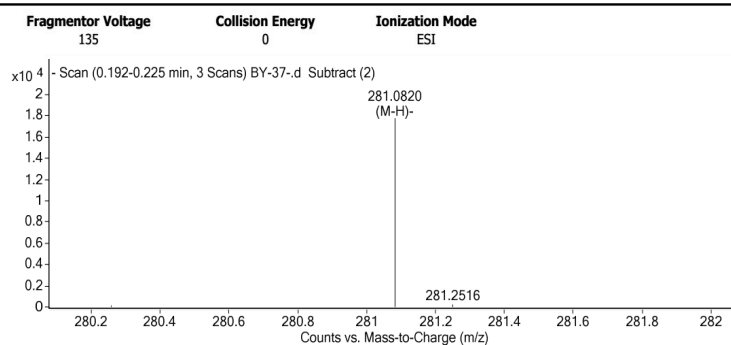

#### Peak List

| <i>m/z</i> | <i>z</i> | Abund    | Formula    | Ion    |
|------------|----------|----------|------------|--------|
| 281.082    | 1        | 17761.73 | C17 H14 O4 | (M-H)- |
| 282.0851   | 1        | 3844.94  | C17 H14 O4 | (M-H)- |
| 311.0921   | 1        | 4198.39  |            |        |
| 395.0744   | 1        | 31143.69 |            |        |
| 396.0783   | 1        | 6990.37  |            |        |
| 397.0799   | 1        | 1059.28  |            |        |
| 425.0846   | 1        | 10681.58 |            |        |
| 426.0884   | 1        | 2398.21  |            |        |

#### Formula Calculator Element Limits

| Element | Min | Max |
|---------|-----|-----|
| C       | 3   | 60  |
| H       | 0   | 120 |
| O       | 0   | 30  |
| N       | 0   | 5   |

#### Formula Calculator Results

| Formula    | CalculatedMass | CalculatedMz | Mz       | Diff. (mDa) | Diff. (ppm) | DBE     |
|------------|----------------|--------------|----------|-------------|-------------|---------|
| C17 H14 O4 | 282.0892       | 281.0819     | 281.0820 | 0.0         | -0.1        | 11.0000 |

--- End Of Report ---

Figure S8. HRESI(+)-MS spectrum of compound 1.

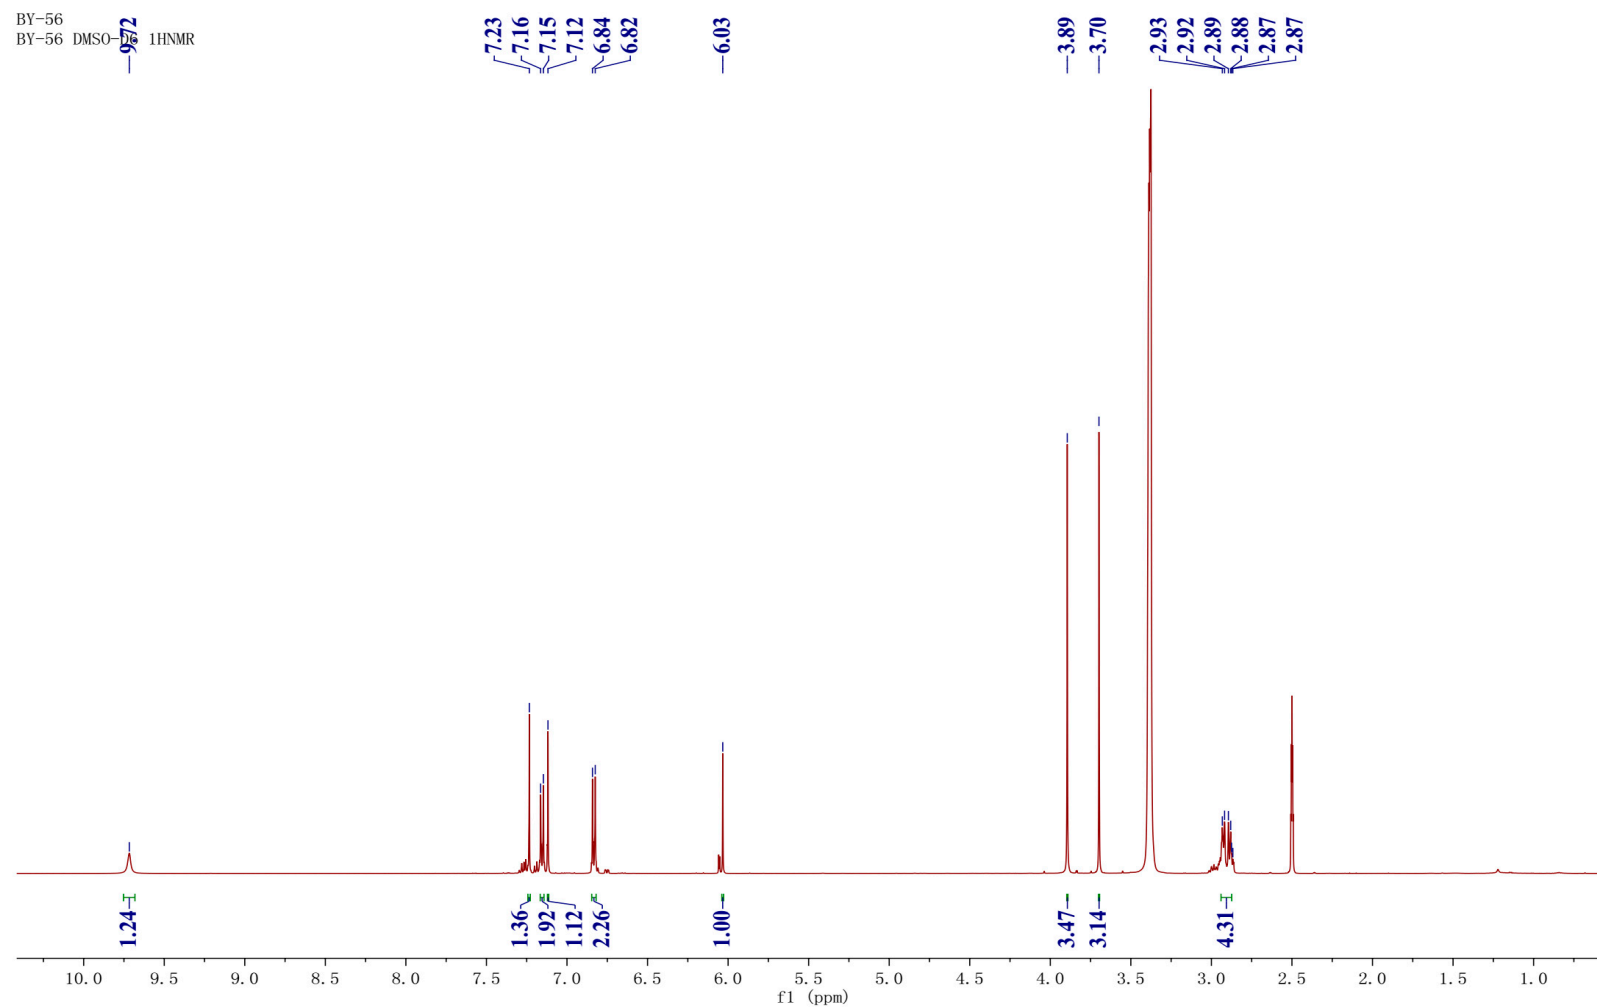

Figure S9.  $^1\text{H}$ -NMR spectrum (500 MHz) of compound 2 in DMSO.

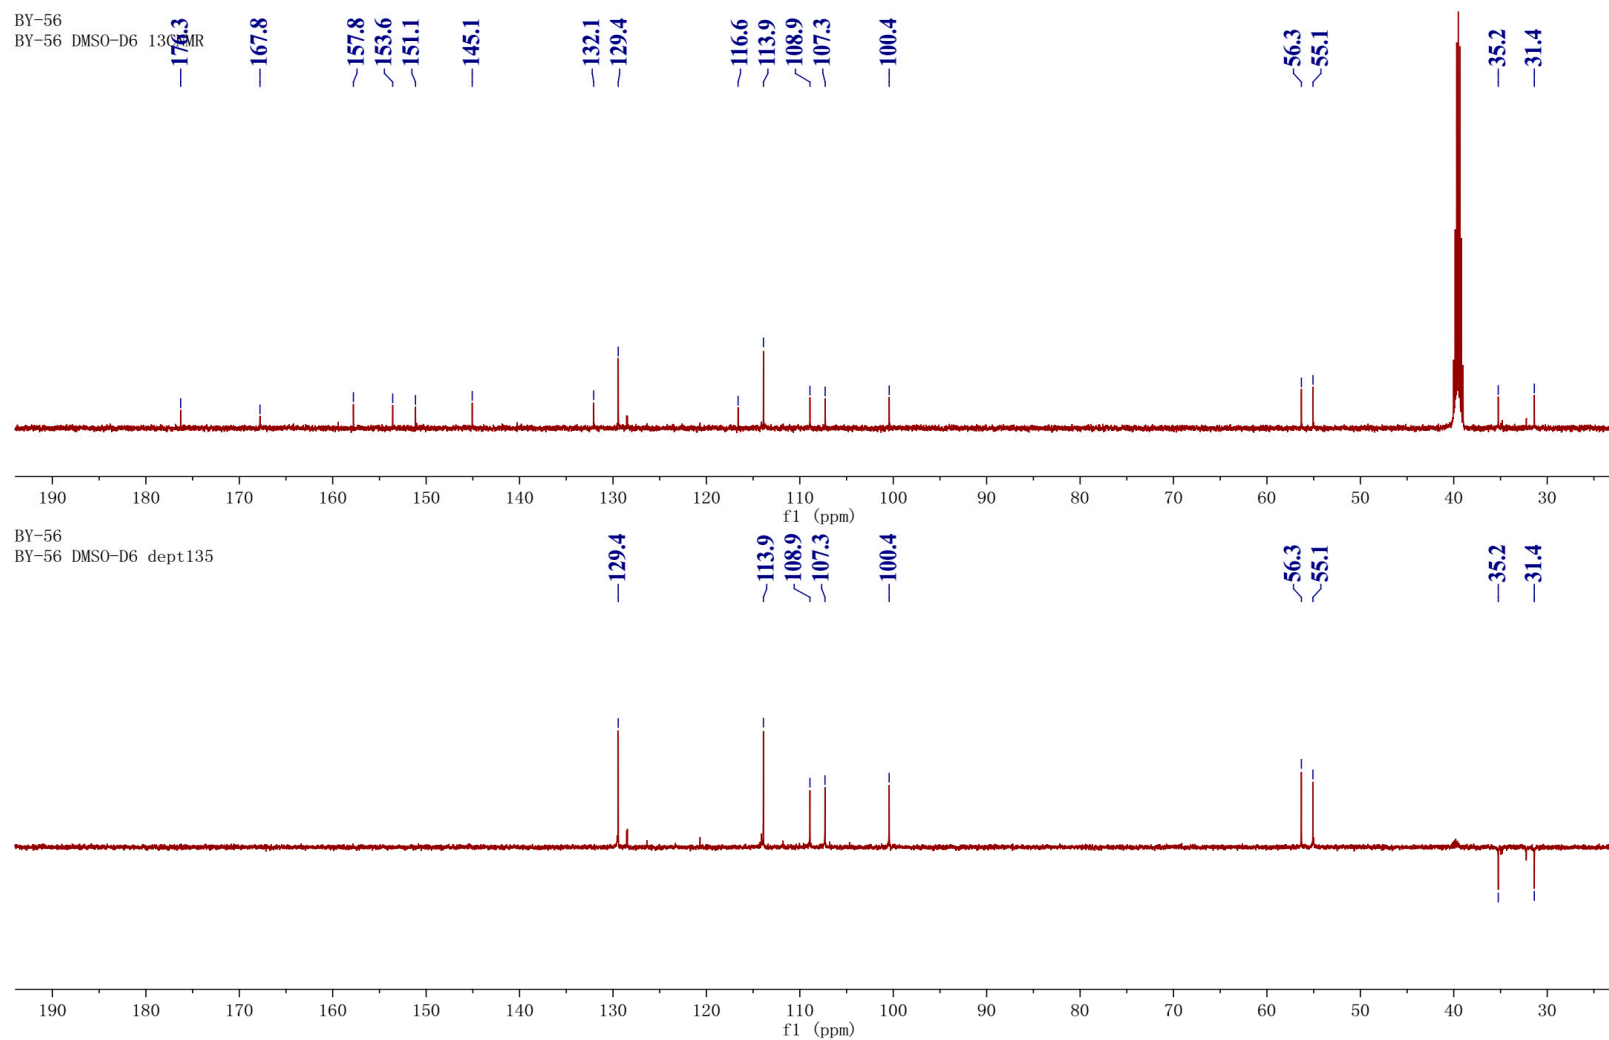

**Figure S10.**  $^{13}\text{C}$ -NMR spectrum (125 MHz) of compound 2 in DMSO.

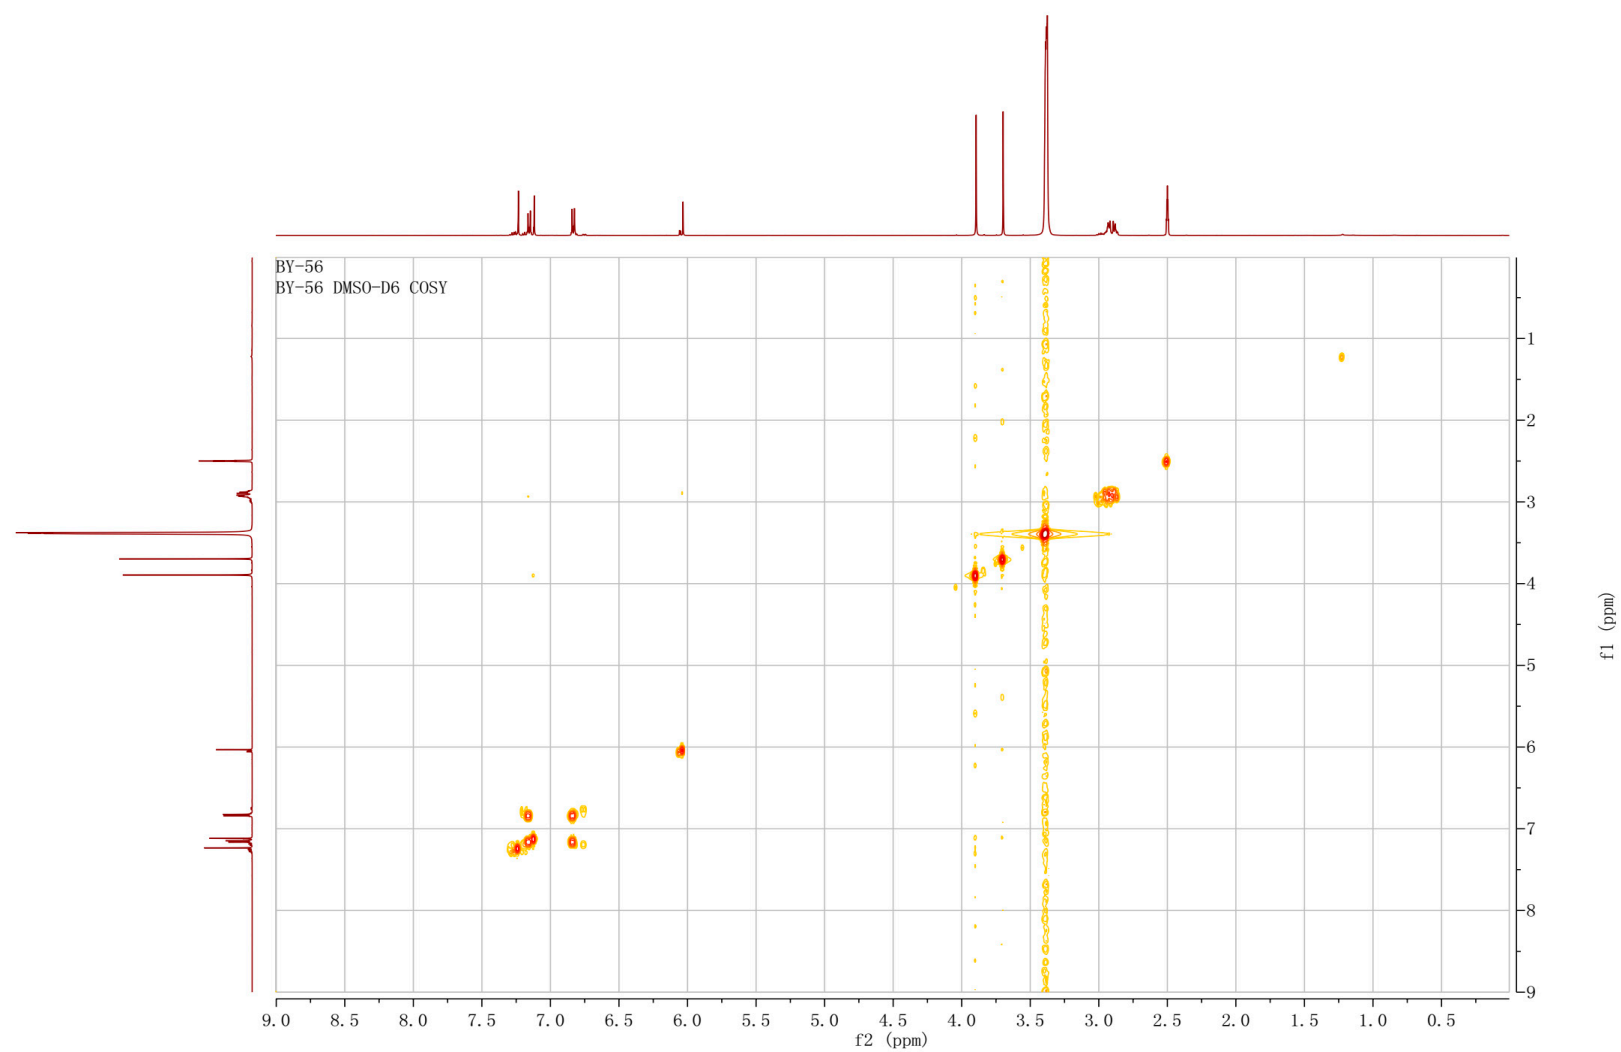

**Figure S11.**  $^1\text{H}$ - $^1\text{H}$  COSY spectrum (500 MHz) of compound **2** in DMSO.

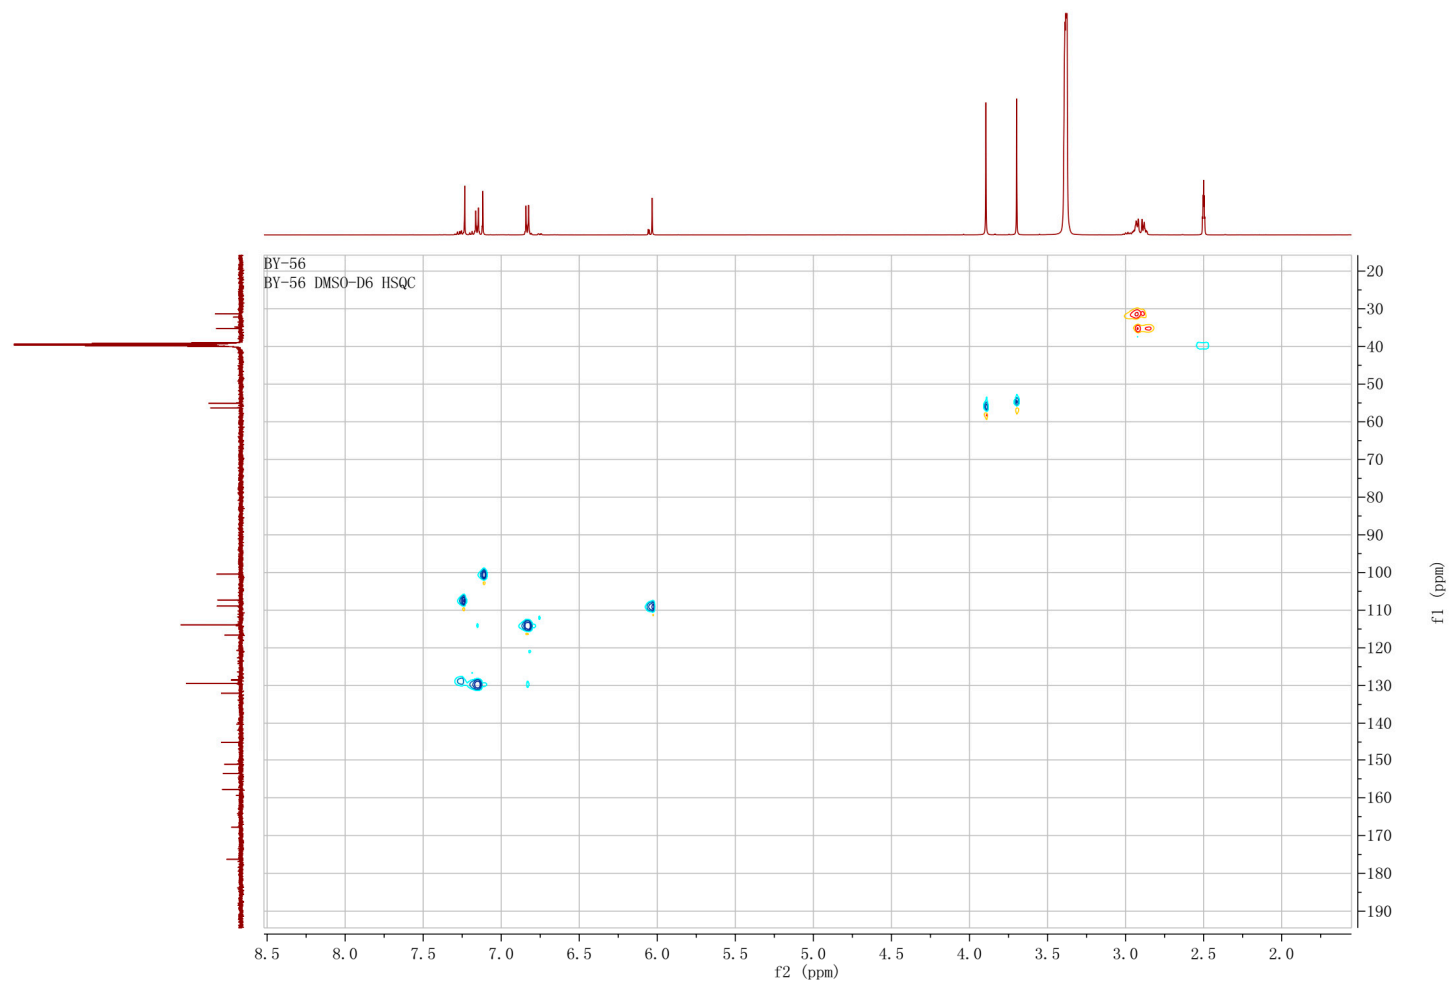

**Figure S12.** HSQC spectrum (500 MHz) of compound **2** in DMSO.

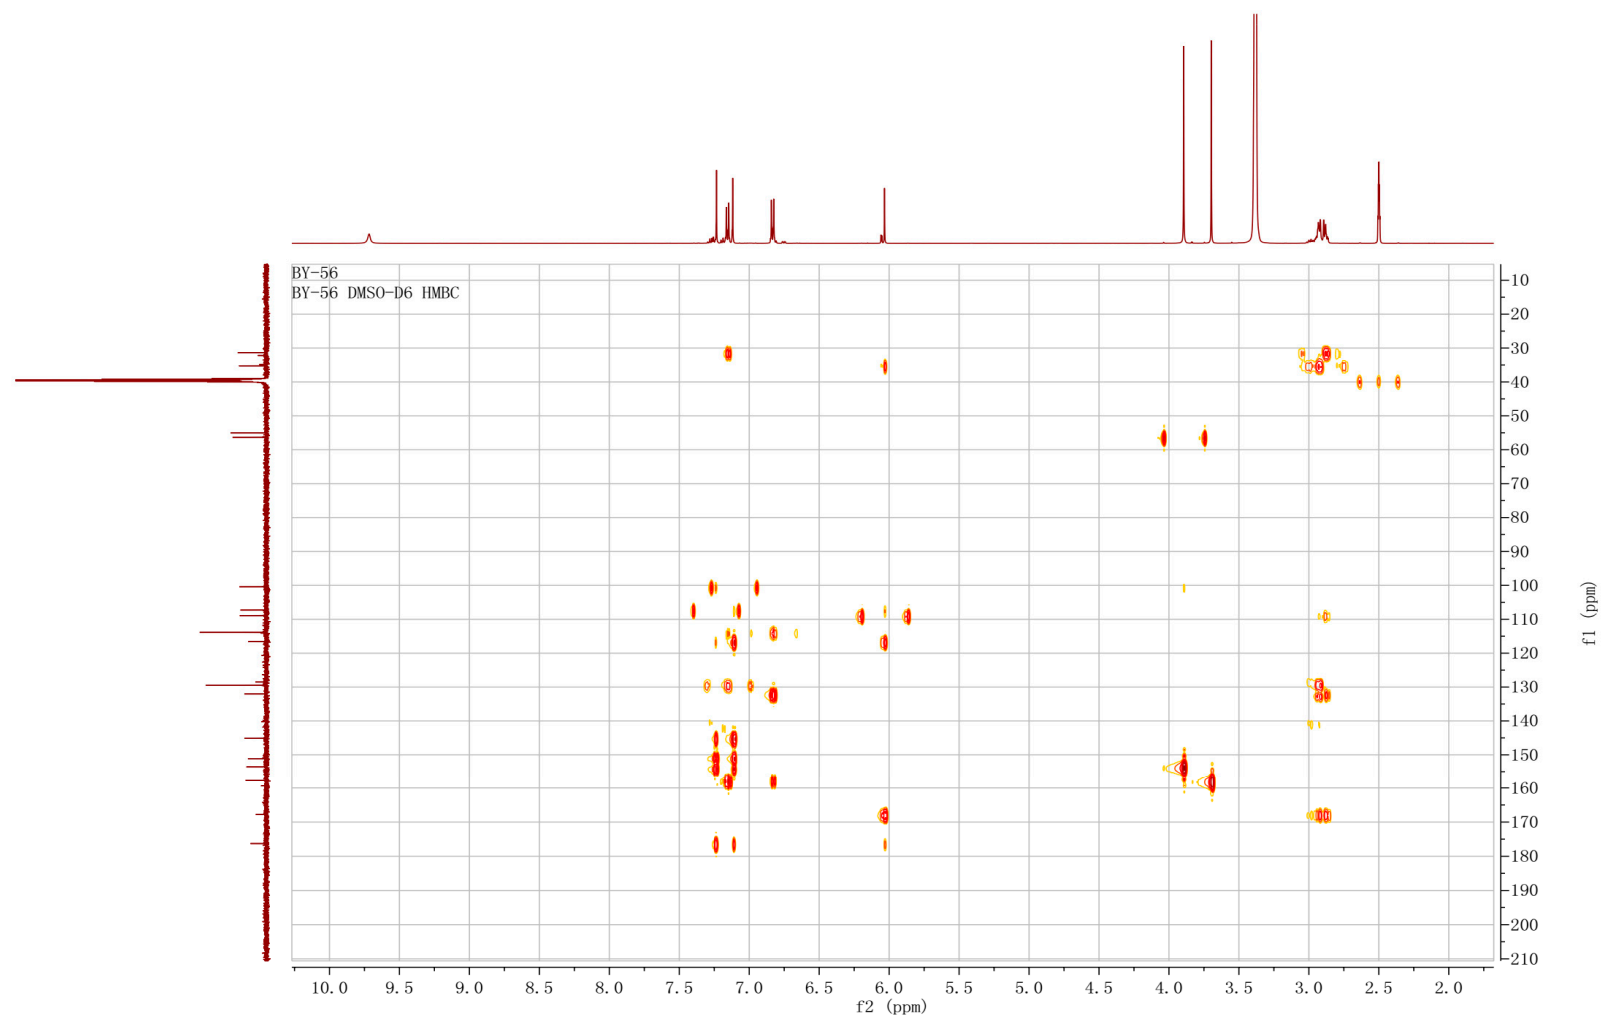

**Figure S13.** HMBC spectrum (500 MHz) of compound 2 in DMSO.

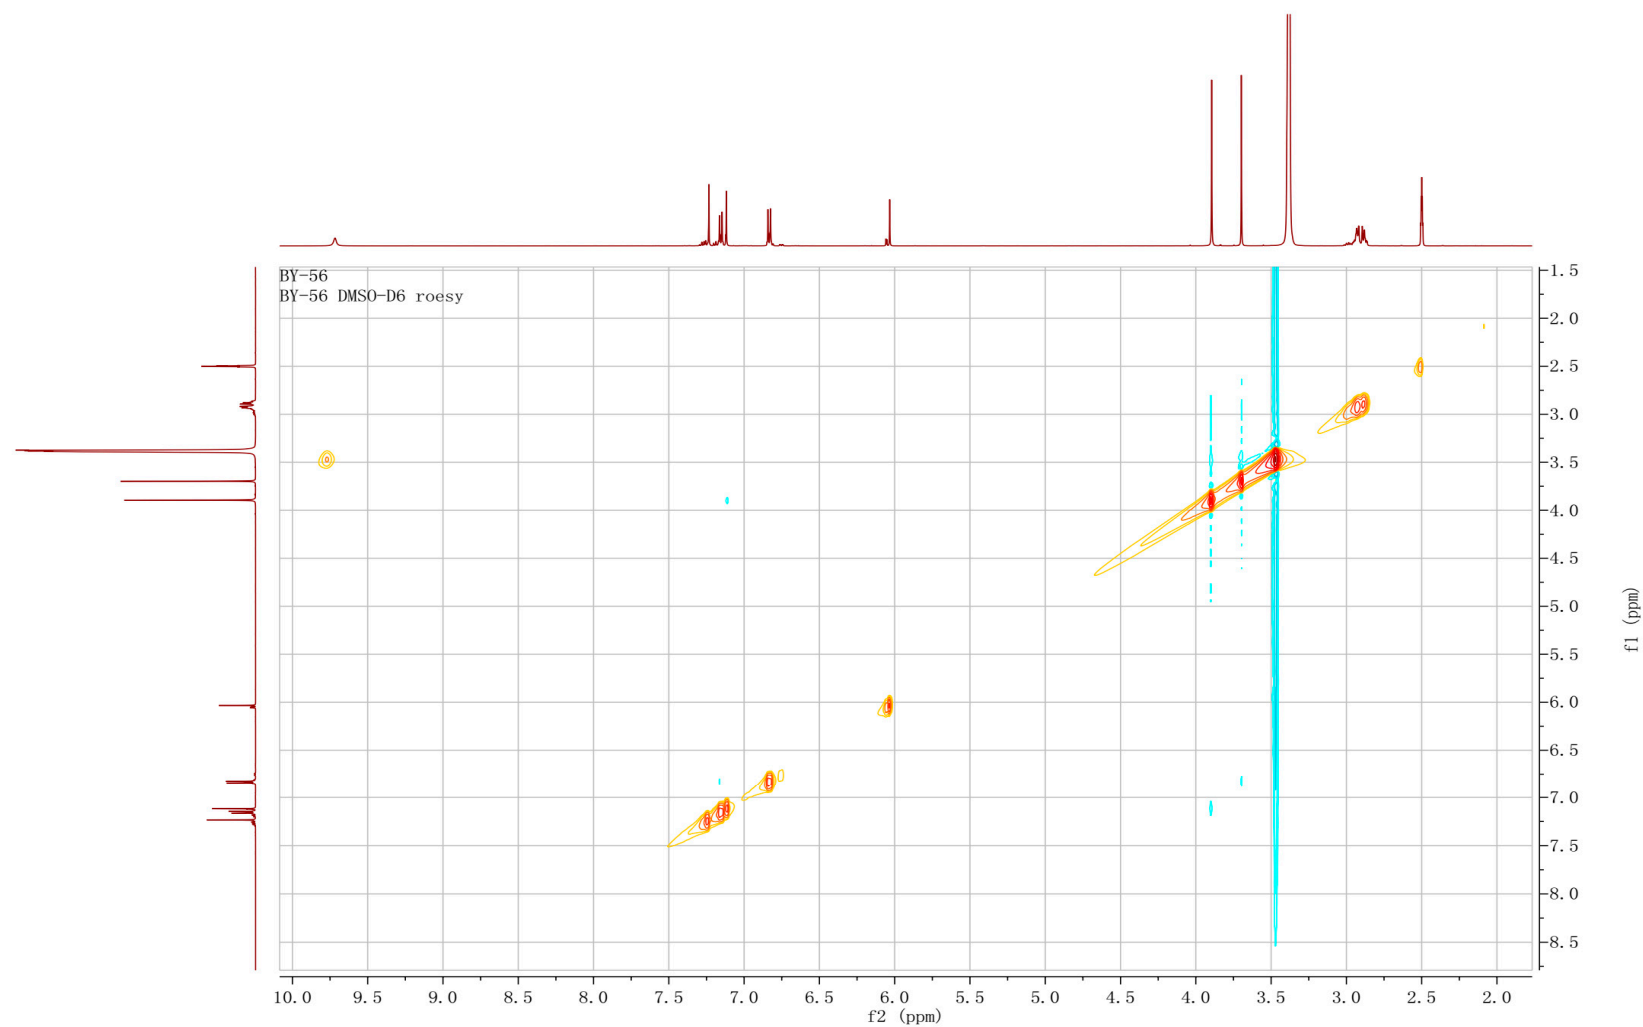

**Figure S14.** ROESY spectrum (400 MHz) of compound **2** in DMSO.

|               |         |             |        |                 |              |                        |                        |
|---------------|---------|-------------|--------|-----------------|--------------|------------------------|------------------------|
| Sample Name   | BY-56   | Position    | P1-C3  | Instrument Name | Instrument 1 | User Name              |                        |
| Inj Vol       | 0.1     | InjPosition |        | SampleType      | Sample       | IRM Calibration Status | Success                |
| Data Filename | BY-56.d | ACQ Method  | SIBU.m | Comment         |              | Acquired Time          | 10/22/2015 11:16:52 AM |

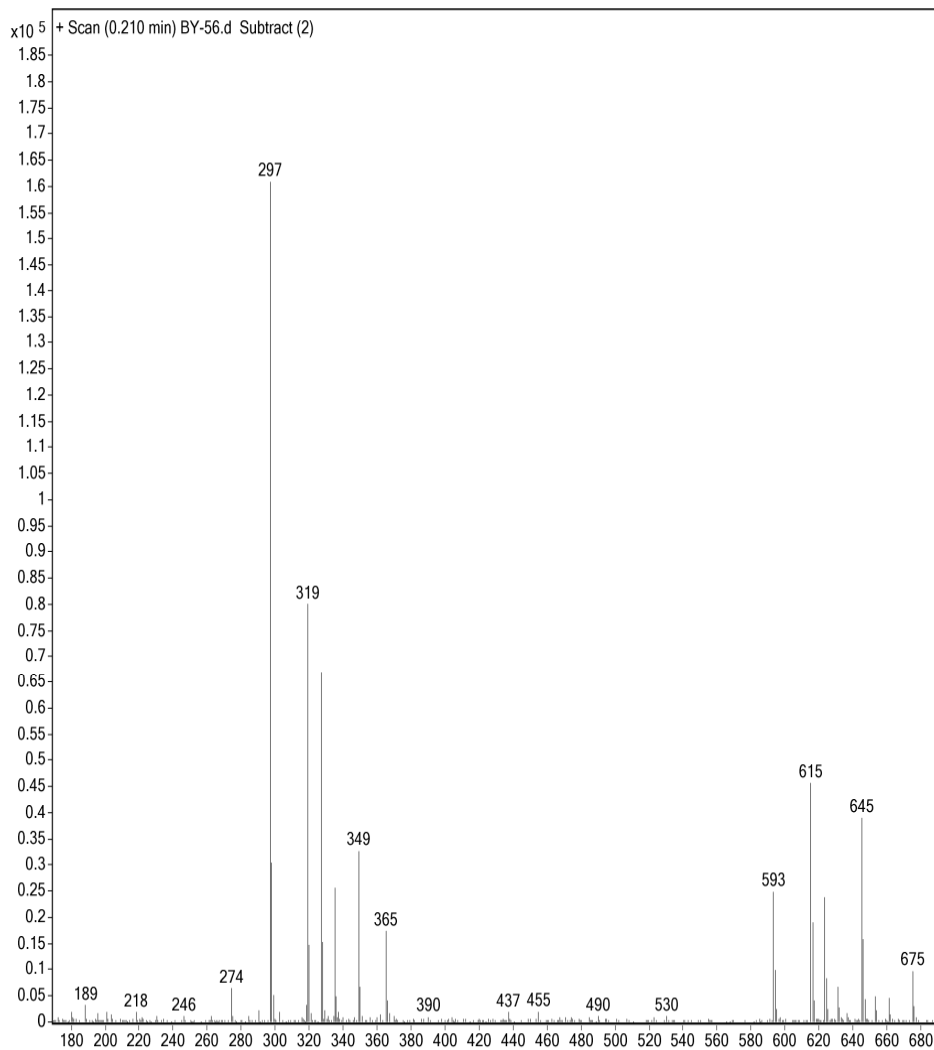

Figure S15. ESI(+)-MS spectrum of compound 2.

## Qualitative Analysis Report

|                        |              |               |                        |
|------------------------|--------------|---------------|------------------------|
| Data Filename          | BY-56.d      | Sample Name   | BY-56                  |
| Sample Type            | Sample       | Position      | P1-C3                  |
| Instrument Name        | Instrument 1 | User Name     |                        |
| Acq Method             | SIBU.m       | Acquired Time | 10/22/2015 11:16:52 AM |
| IRM Calibration Status | Success      | DA Method     | ESI+.m                 |
| Comment                |              |               |                        |

|                |                             |       |  |
|----------------|-----------------------------|-------|--|
| Sample Group   |                             | Info. |  |
| Acquisition SW | 6200 series TOF/6500 series |       |  |
| Version        | Q-TOF B.05.01 (B5125.2)     |       |  |

### User Spectra

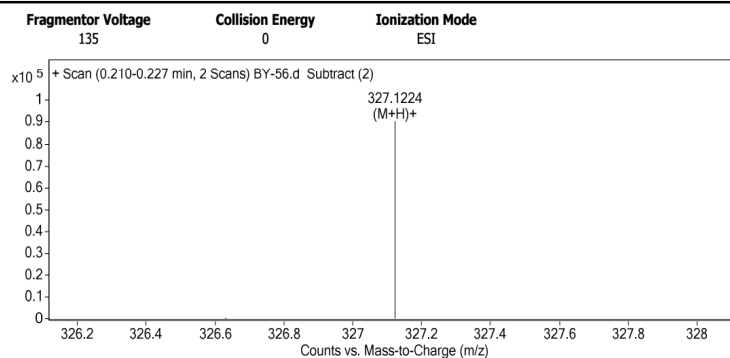

#### Peak List

| m/z      | z | Abund     | Formula    | Ion    |
|----------|---|-----------|------------|--------|
| 297.1121 | 1 | 218337.25 |            |        |
| 319.094  | 1 | 102590.45 |            |        |
| 327.1224 | 1 | 90408.25  | C19 H18 O5 | (M+H)+ |
| 349.1047 | 1 | 43308.2   |            |        |
| 593.2171 | 1 | 49472.85  |            |        |
| 615.1992 | 1 | 108167.98 |            |        |
| 623.2275 | 1 | 45127.51  |            |        |
| 645.2098 | 1 | 93037.04  |            |        |

#### Formula Calculator Element Limits

| Element | Min | Max |
|---------|-----|-----|
| C       | 3   | 60  |
| H       | 0   | 120 |
| O       | 0   | 30  |
| N       | 0   | 30  |

#### Formula Calculator Results

| Formula    | CalculatedMass | CalculatedMz | Mz       | Diff. (mDa) | Diff. (ppm) | DBE     |
|------------|----------------|--------------|----------|-------------|-------------|---------|
| C19 H18 O5 | 326.1154       | 327.1227     | 327.1224 | 0.3         | 1.0         | 11.0000 |

--- End Of Report ---

**Figure S16.** HRESI(+)MS spectrum of compound 2.

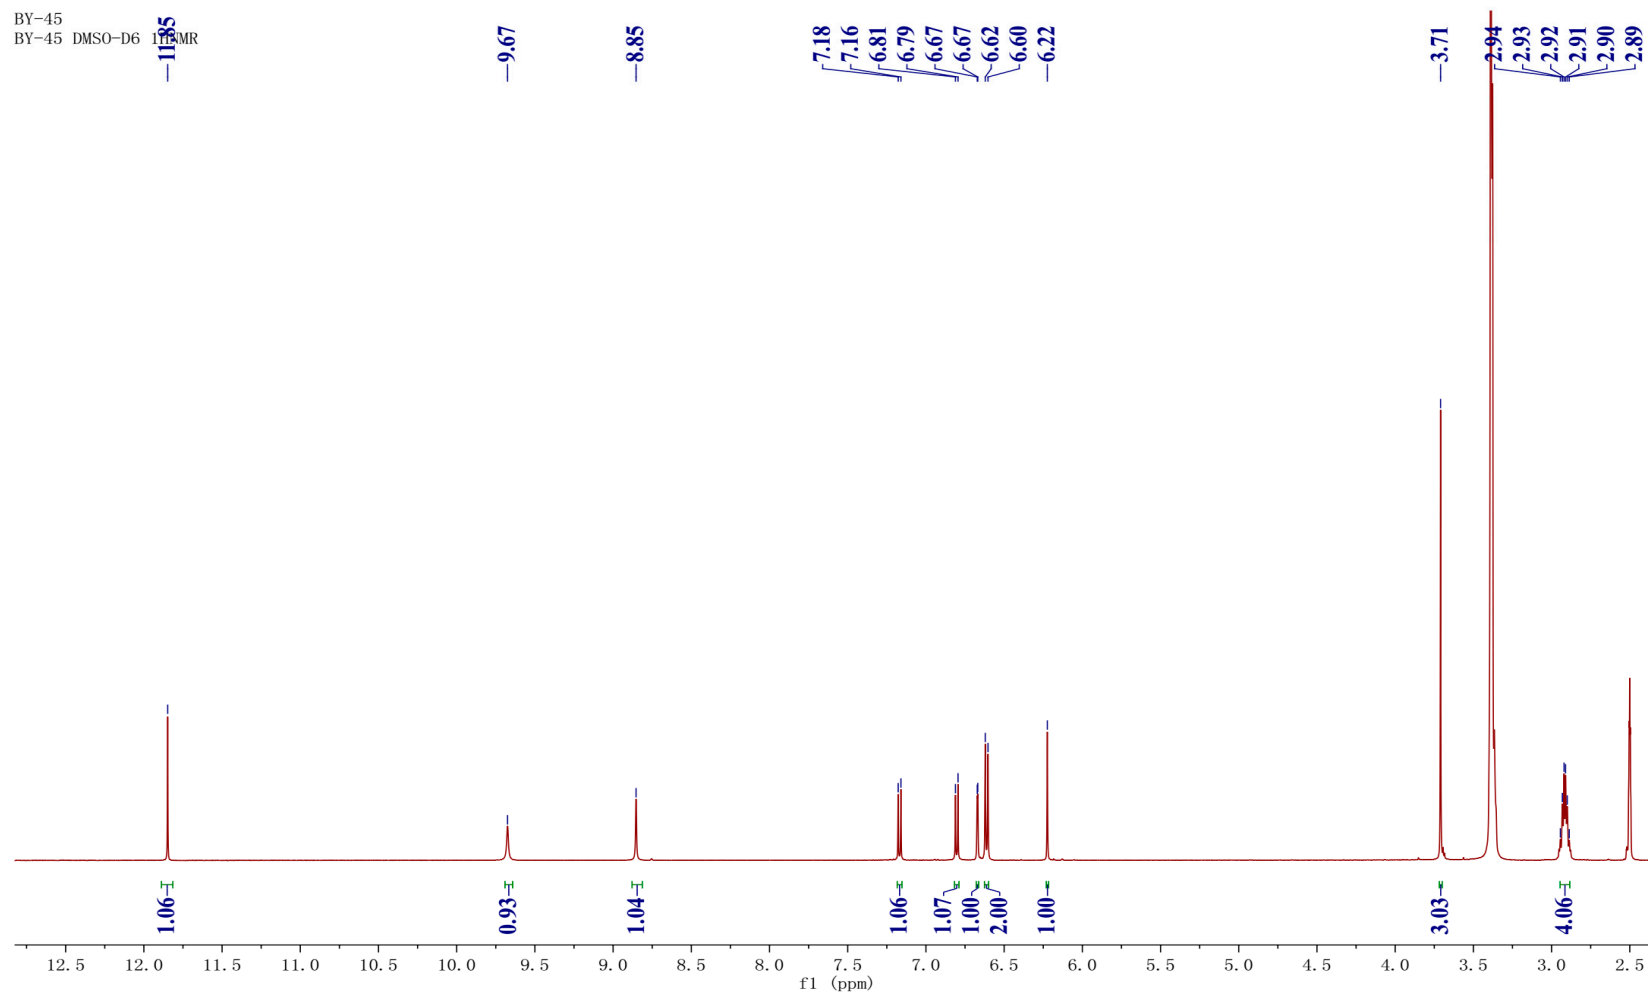

**Figure S17.**  $^1\text{H}$ -NMR spectrum (500 MHz) of compound **3** in DMSO.

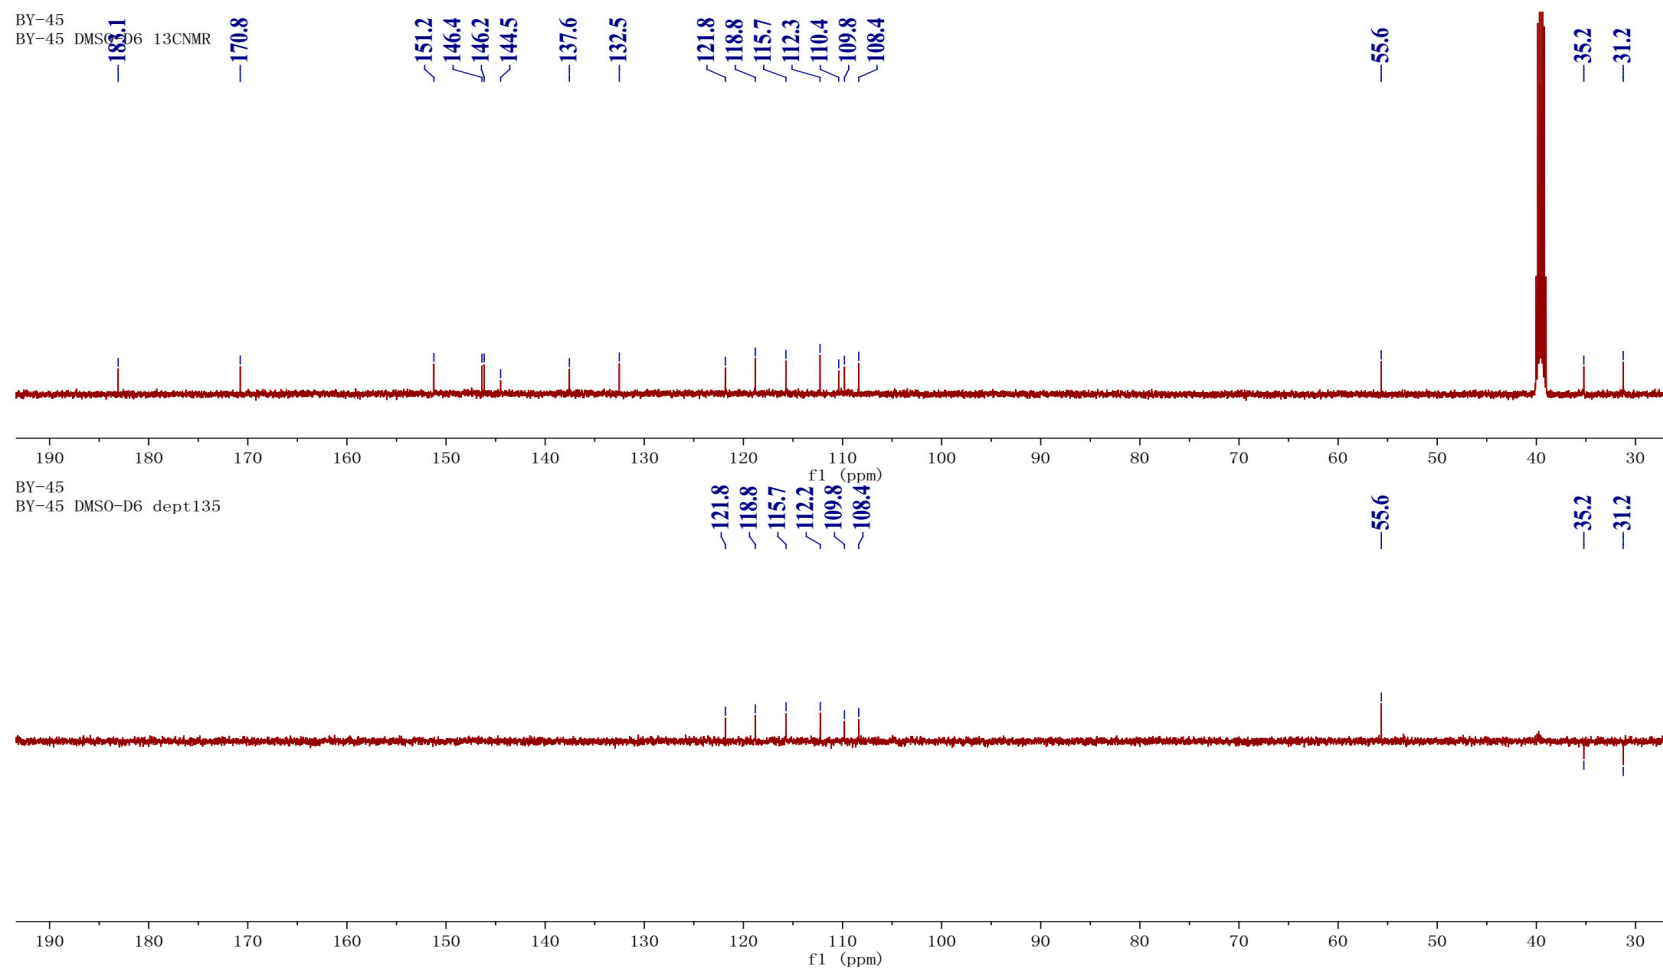

**Figure S18.** <sup>13</sup>C-NMR spectrum (125 MHz) of compound 3 in DMSO.

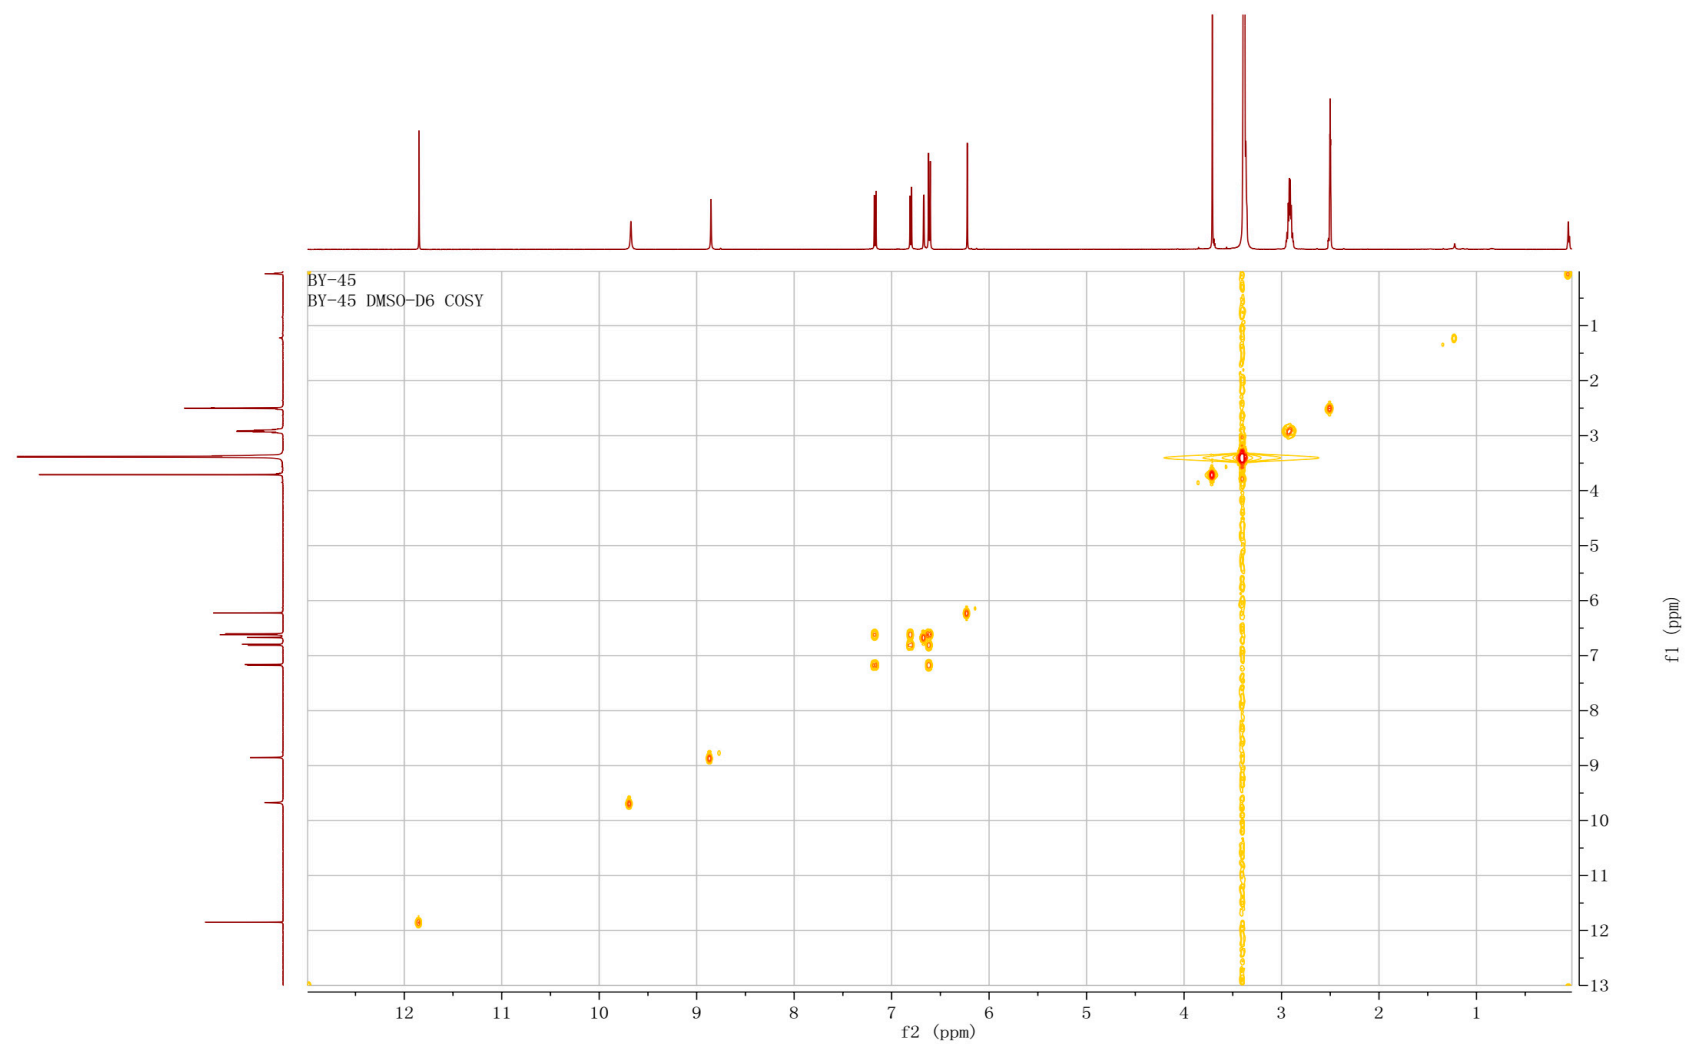

**Figure S19.**  $^1\text{H}$ - $^1\text{H}$  COSY spectrum (500 MHz) of compound **3** in DMSO.

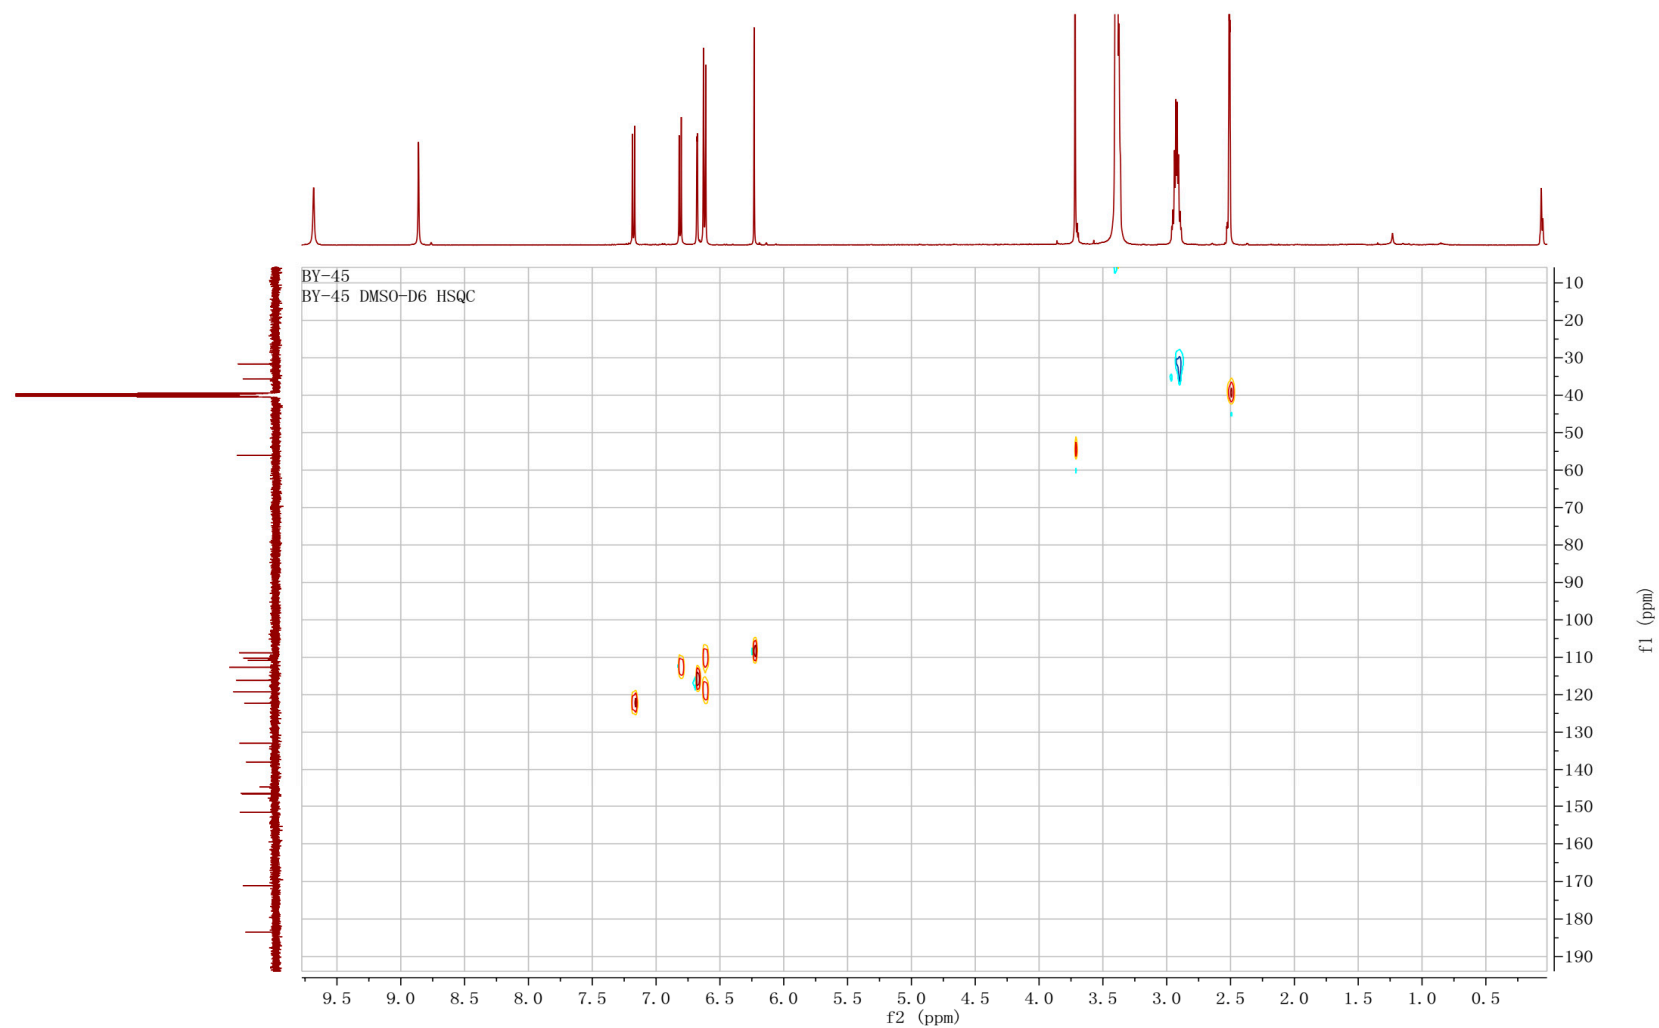

**Figure S20.** HSQC spectrum (500 MHz) of compound **3** in DMSO.

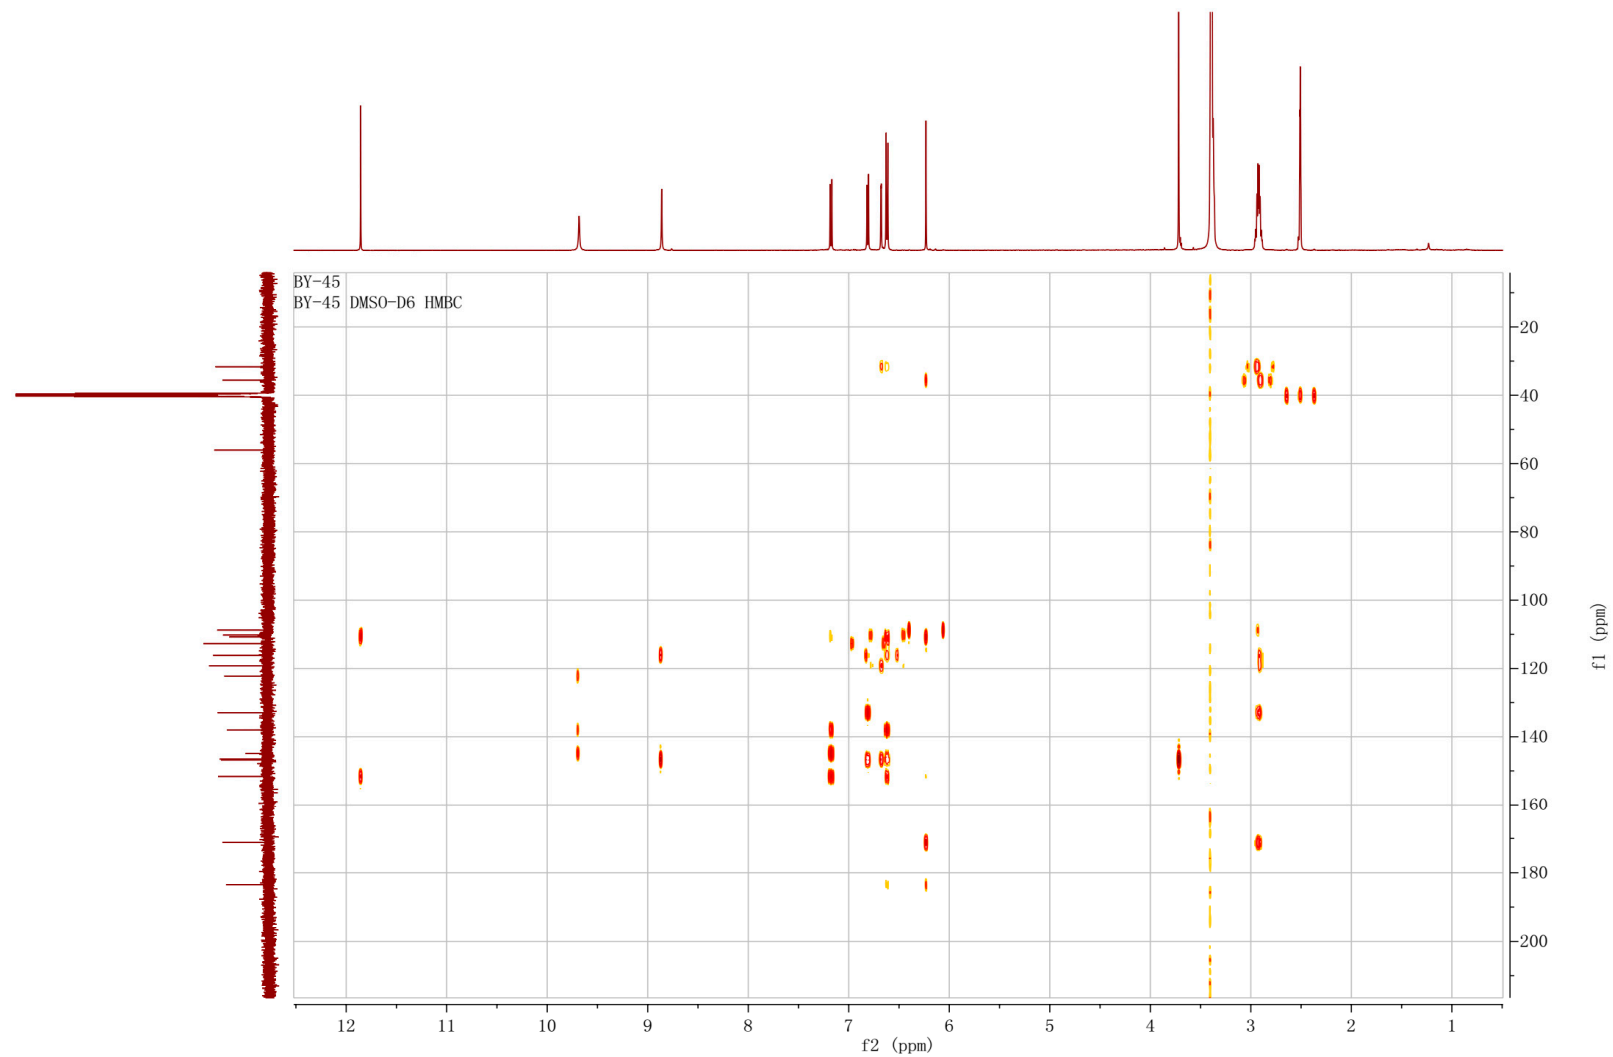

**Figure S21.** HMBC spectrum (500 MHz) of compound **3** in DMSO.

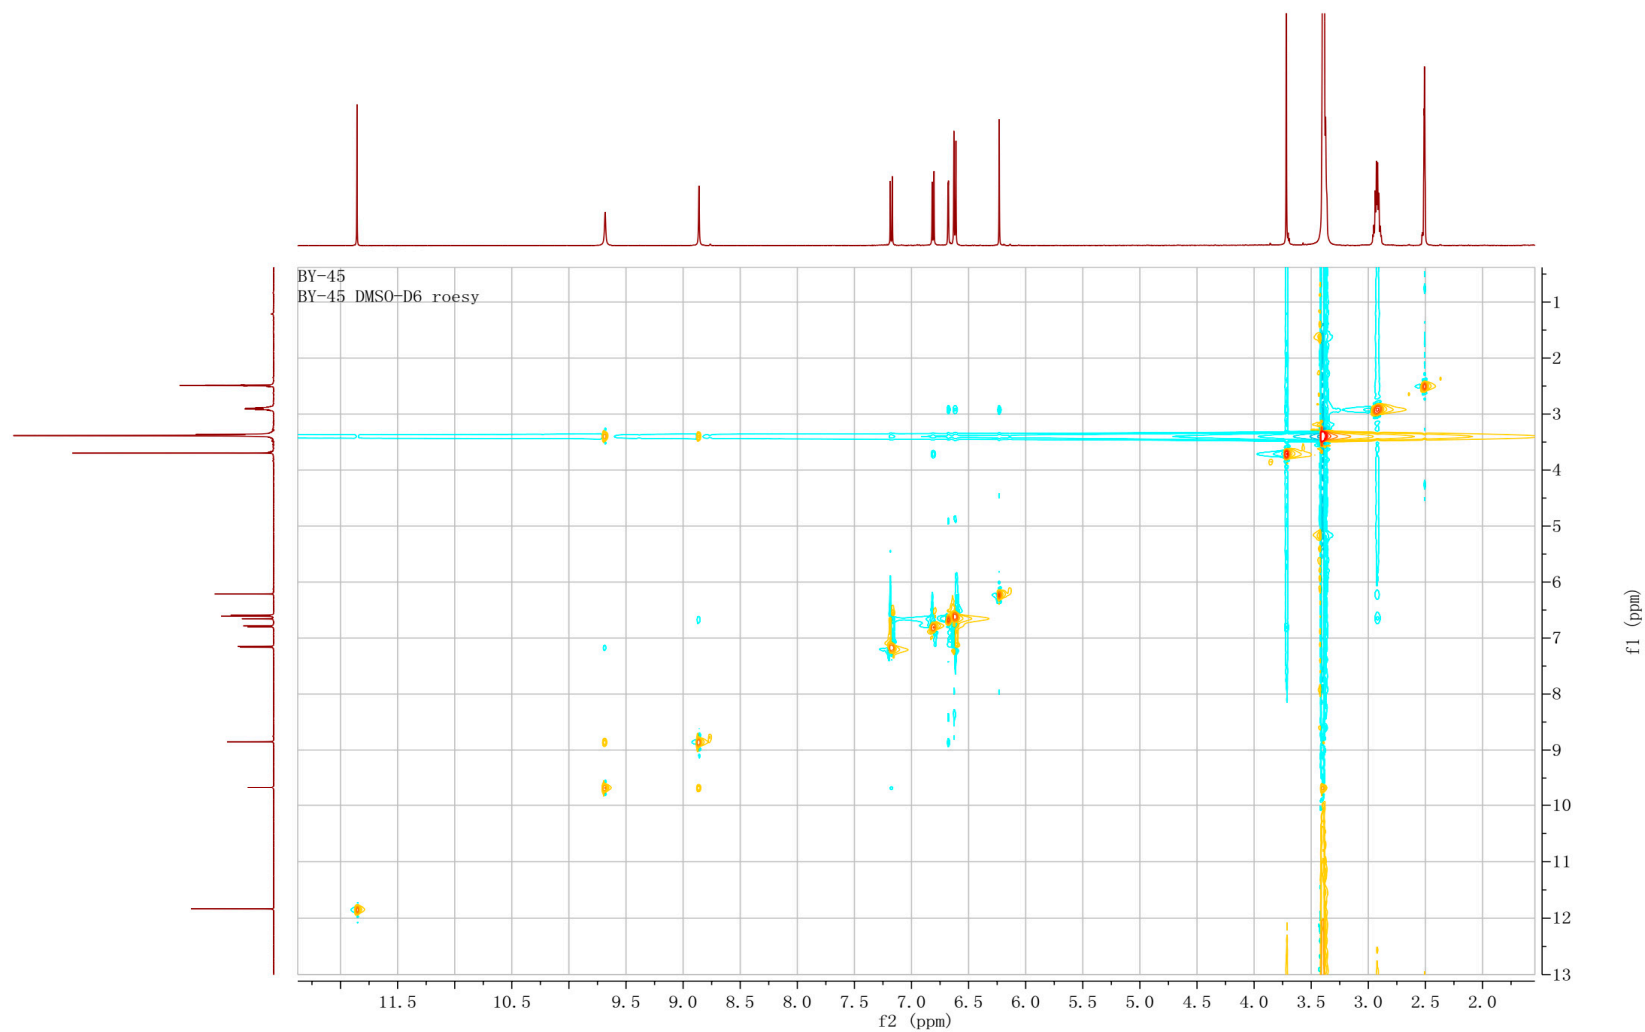

**Figure S22.** ROESY spectrum (400 MHz) of compound **3** in DMSO.

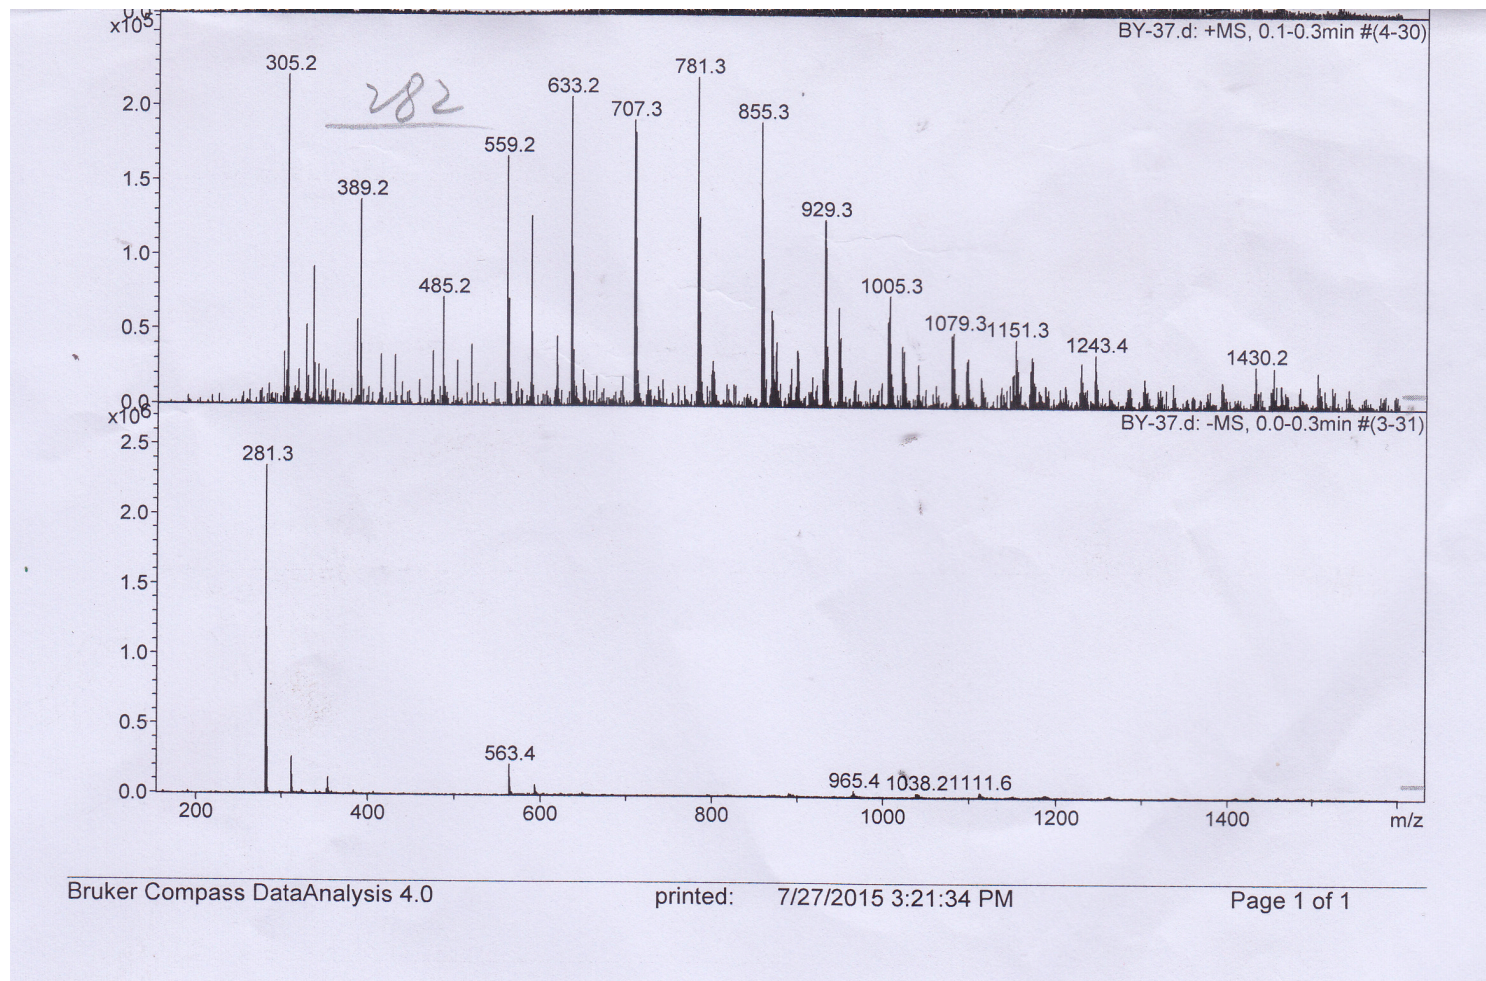

**Figure S23.** ESI(+)-MS spectrum of compound 3.

## Qualitative Analysis Report

|                        |              |               |                       |
|------------------------|--------------|---------------|-----------------------|
| Data Filename          | BY-45-.d     | Sample Name   | BY-45                 |
| Sample Type            | Sample       | Position      | P1-C2                 |
| Instrument Name        | Instrument 1 | User Name     |                       |
| Acq Method             | SIBU-ESI-i.m | Acquired Time | 10/22/2015 3:20:12 PM |
| IRM Calibration Status | Success      | DA Method     | ESI+.m                |
| Comment                |              |               |                       |

|                |                             |       |
|----------------|-----------------------------|-------|
| Sample Group   |                             | Info. |
| Acquisition SW | 6200 series TOF/6500 series |       |
| Version        | Q-TOF B.05.01 (B5125.2)     |       |

### User Spectra

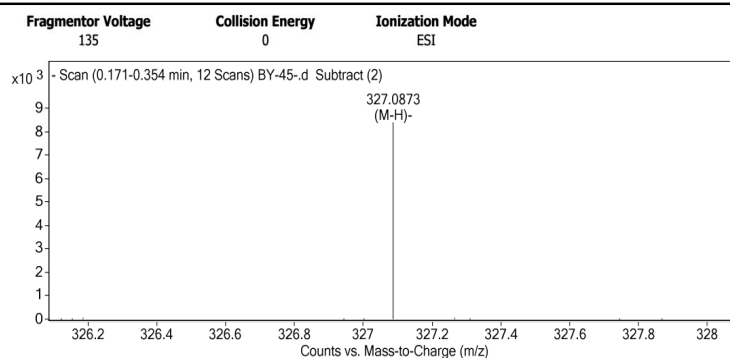

#### Peak List

| m/z      | z | Abund    | Formula    | Ion    |
|----------|---|----------|------------|--------|
| 89.0246  |   | 1365.38  |            |        |
| 327.0873 | 1 | 8401.06  | C18 H16 O6 | (M-H)- |
| 328.0908 | 1 | 1529.88  | C18 H16 O6 | (M-H)- |
| 390.0831 | 1 | 1013.56  |            |        |
| 411.0692 | 1 | 706.99   |            |        |
| 441.08   | 1 | 19259.49 |            |        |
| 442.0848 | 1 | 3664.01  |            |        |
| 443.0859 | 1 | 724.34   |            |        |

#### Formula Calculator Element Limits

| Element | Min | Max |
|---------|-----|-----|
| C       | 3   | 60  |
| H       | 0   | 120 |
| O       | 0   | 30  |
| N       | 0   | 5   |

#### Formula Calculator Results

| Formula    | CalculatedMass | CalculatedMz | Mz       | Diff. (mDa) | Diff. (ppm) | DBE     |
|------------|----------------|--------------|----------|-------------|-------------|---------|
| C18 H16 O6 | 328.0947       | 327.0874     | 327.0873 | -0.1        | -0.3        | 11.0000 |

--- End Of Report ---

Figure S24. HRESI(+)MS spectrum of compound 3.

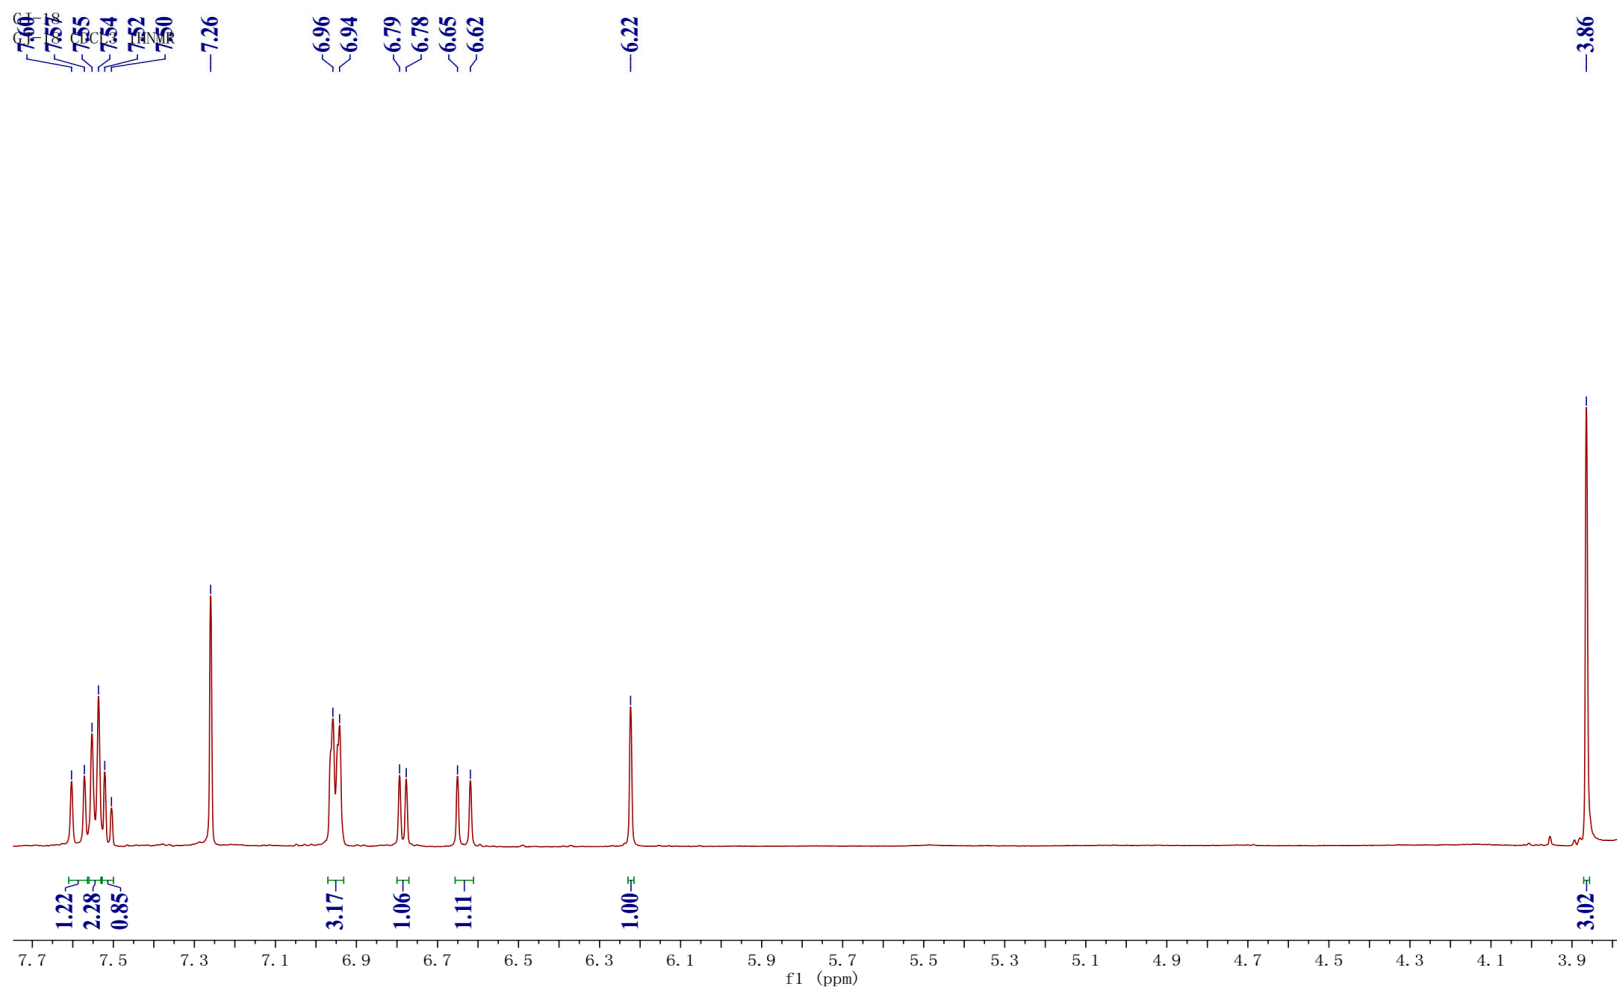

Figure S25. <sup>1</sup>H-NMR spectrum (500 MHz) of compound 4 in CDCl<sub>3</sub>.

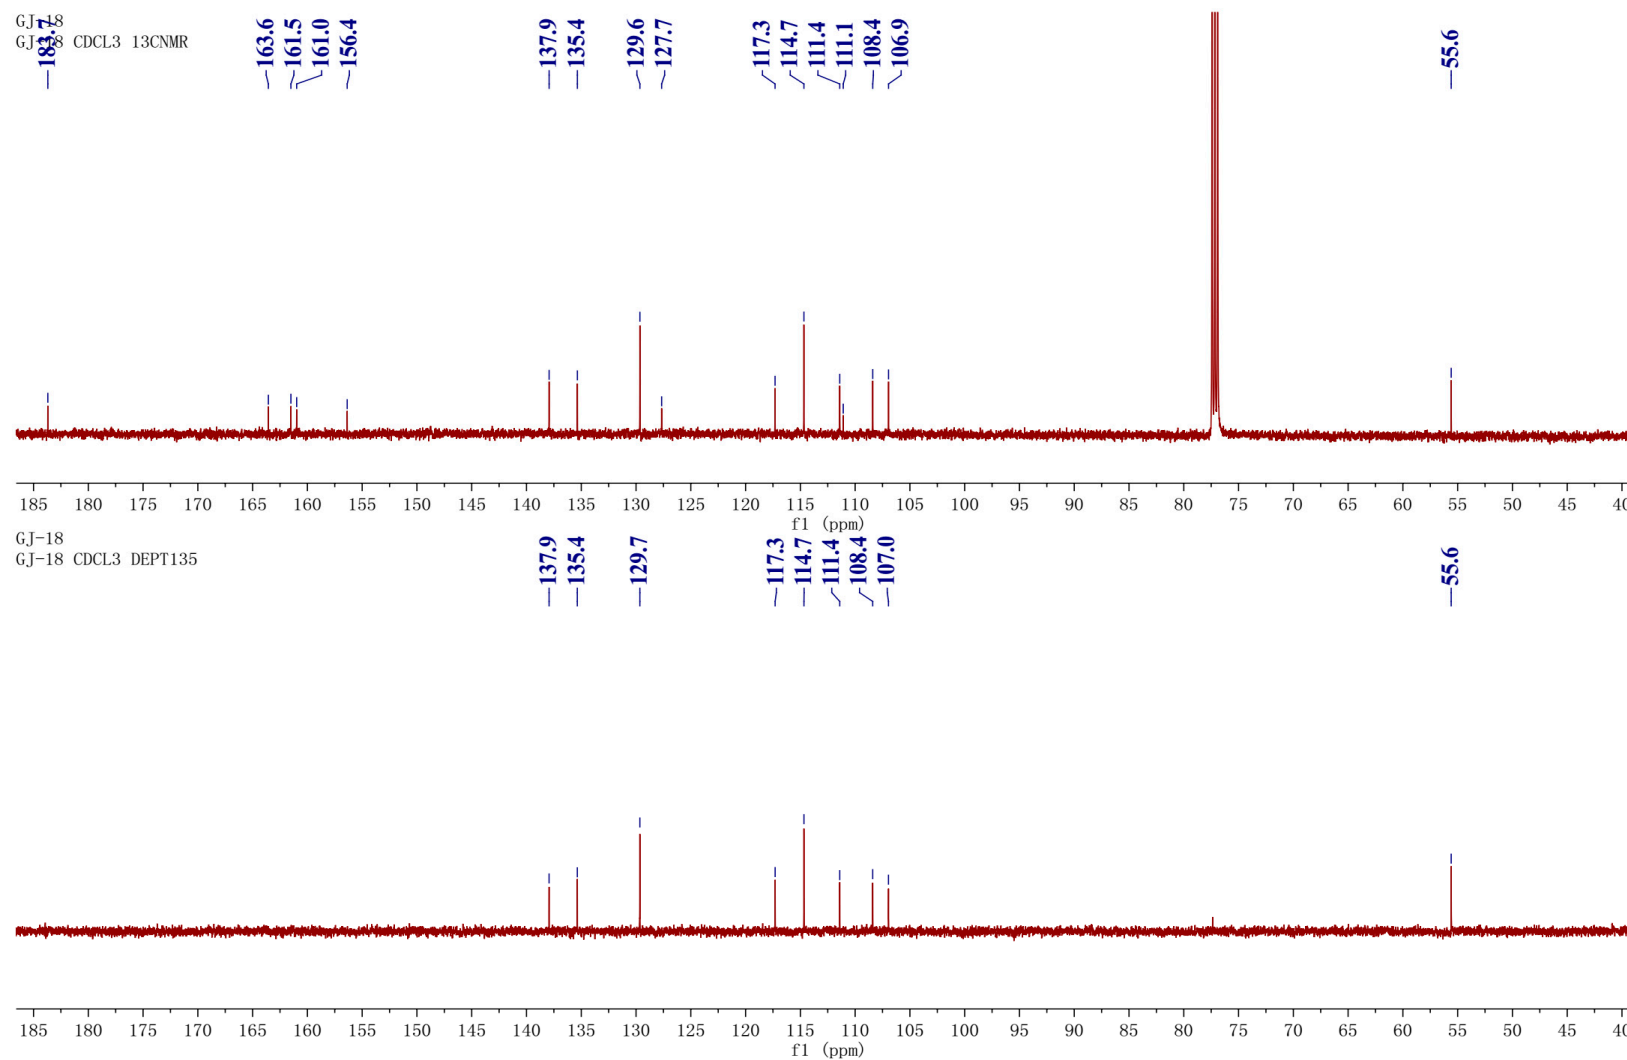

Figure S26. <sup>13</sup>C-NMR spectrum (125 MHz) of compound **4** in CDCl<sub>3</sub>.

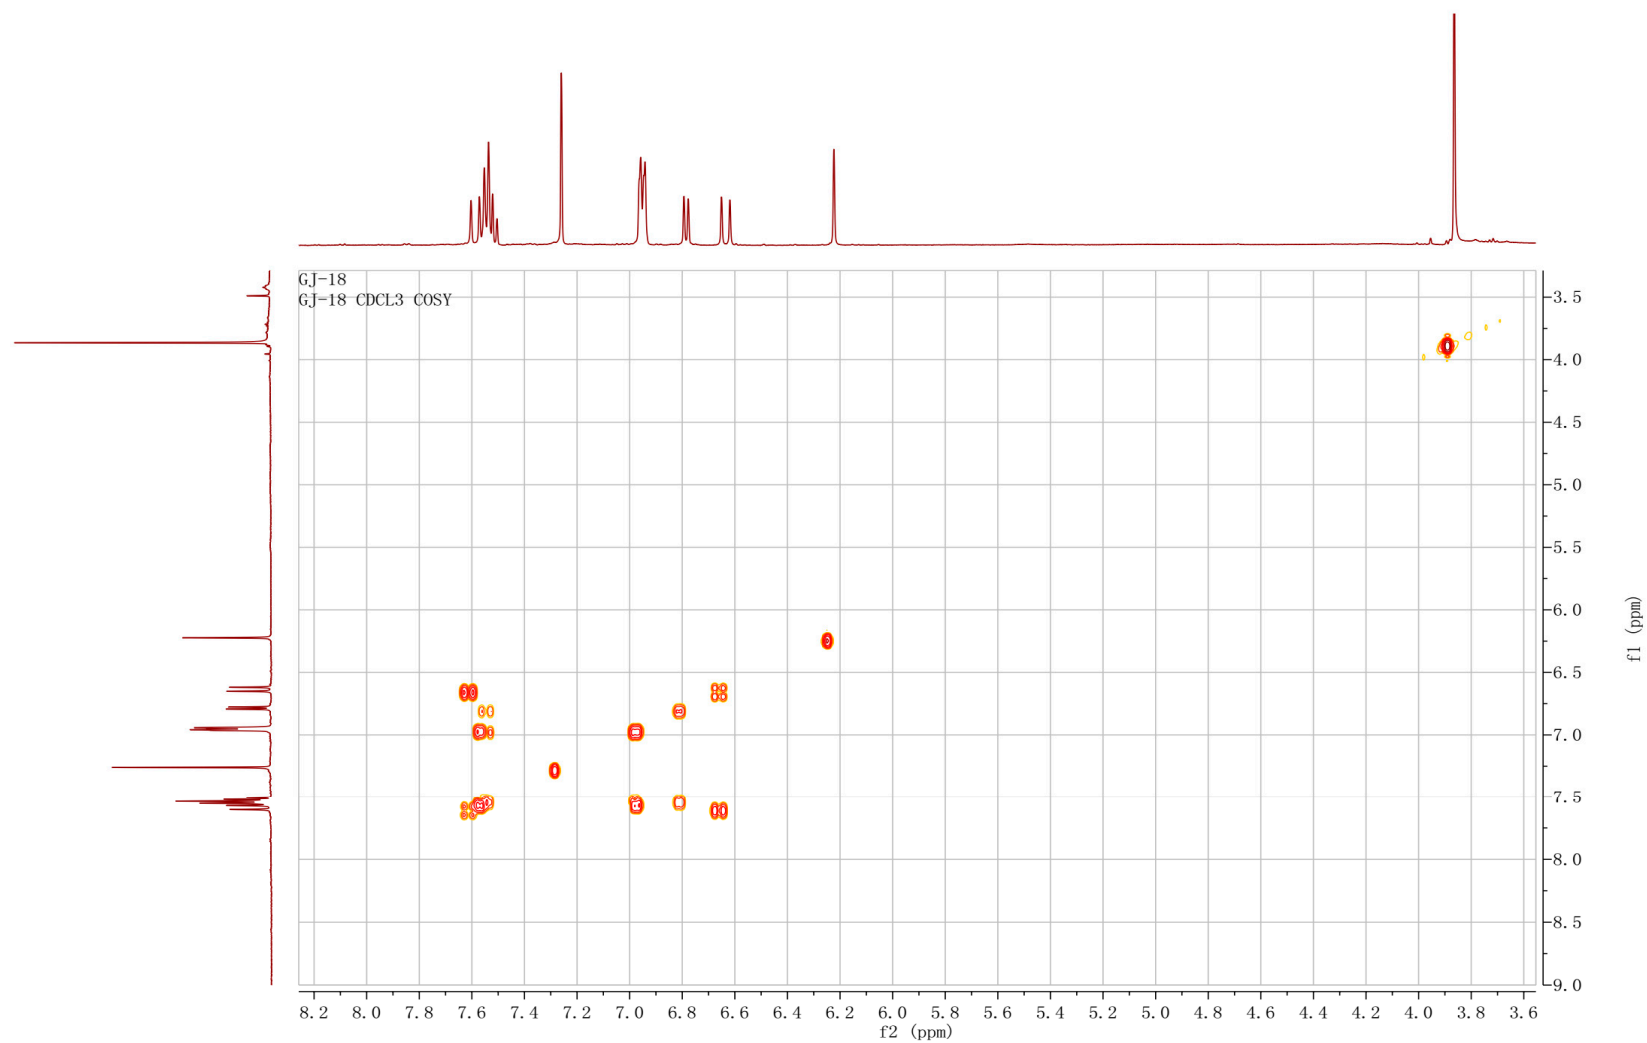

Figure S27.  $^1\text{H}$ - $^1\text{H}$  COSY spectrum (500 MHz) of compound **4** in  $\text{CDCl}_3$ .

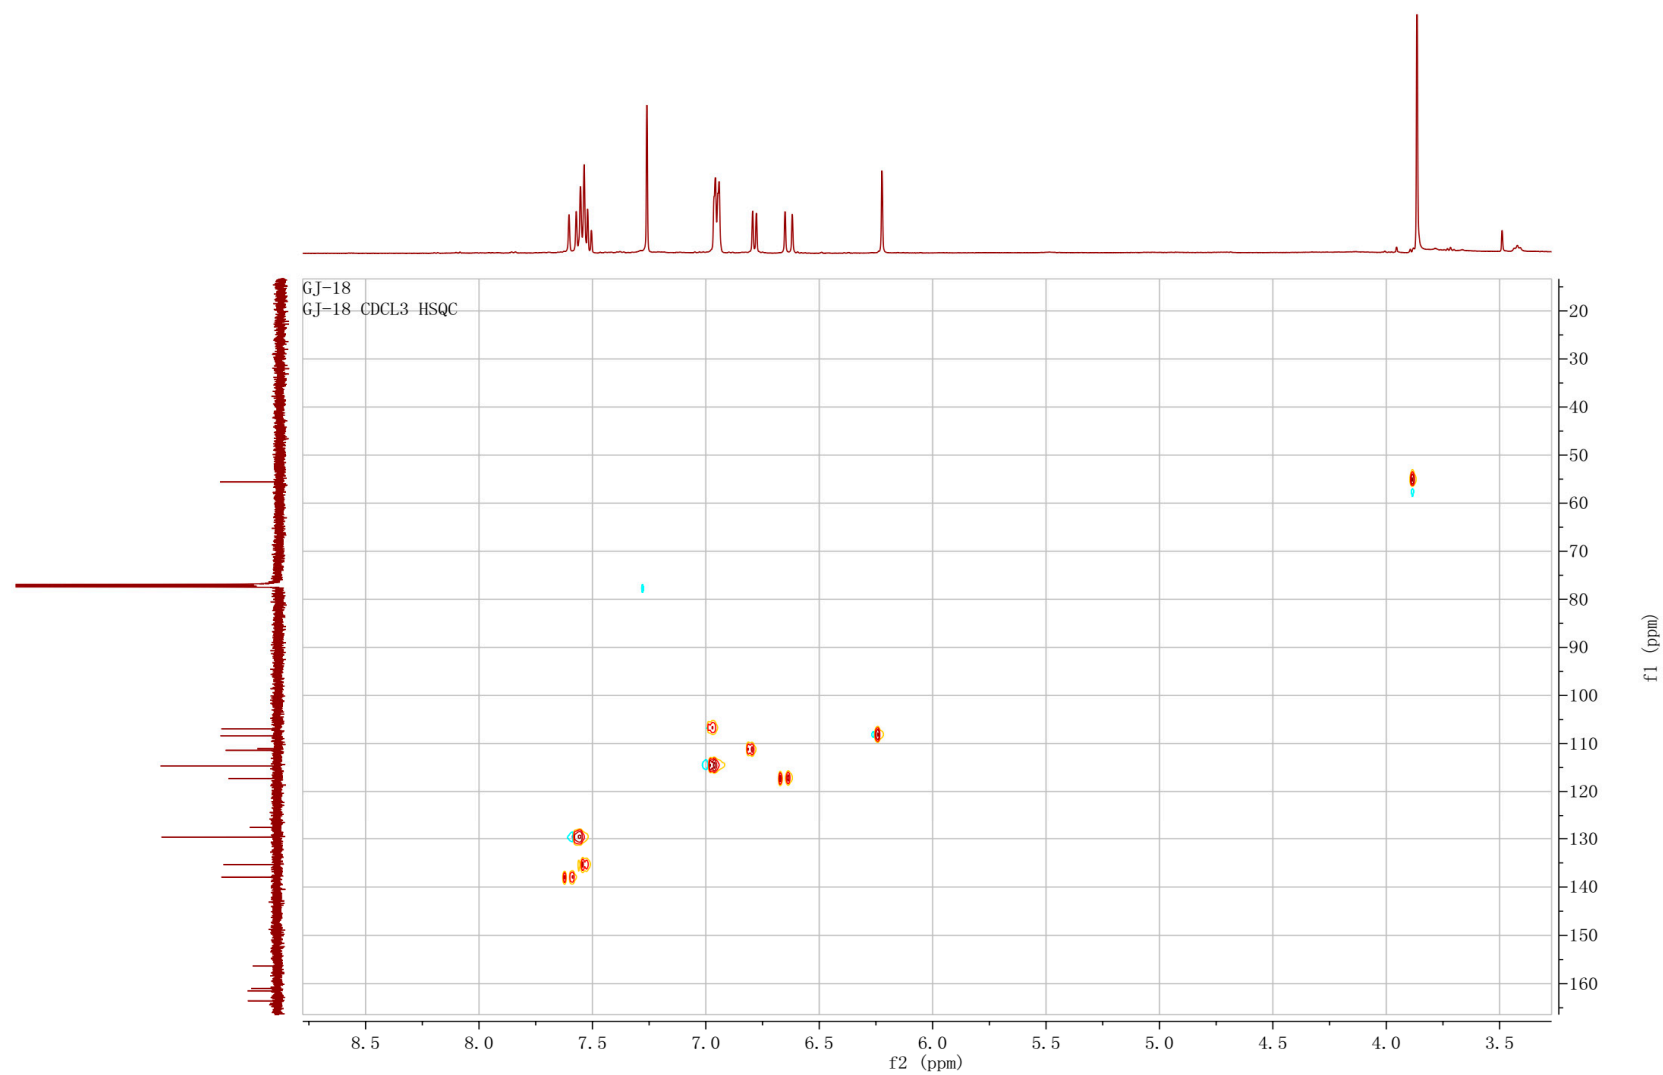

Figure S28. HSQC spectrum (500 MHz) of compound **4** in CDCl<sub>3</sub>.

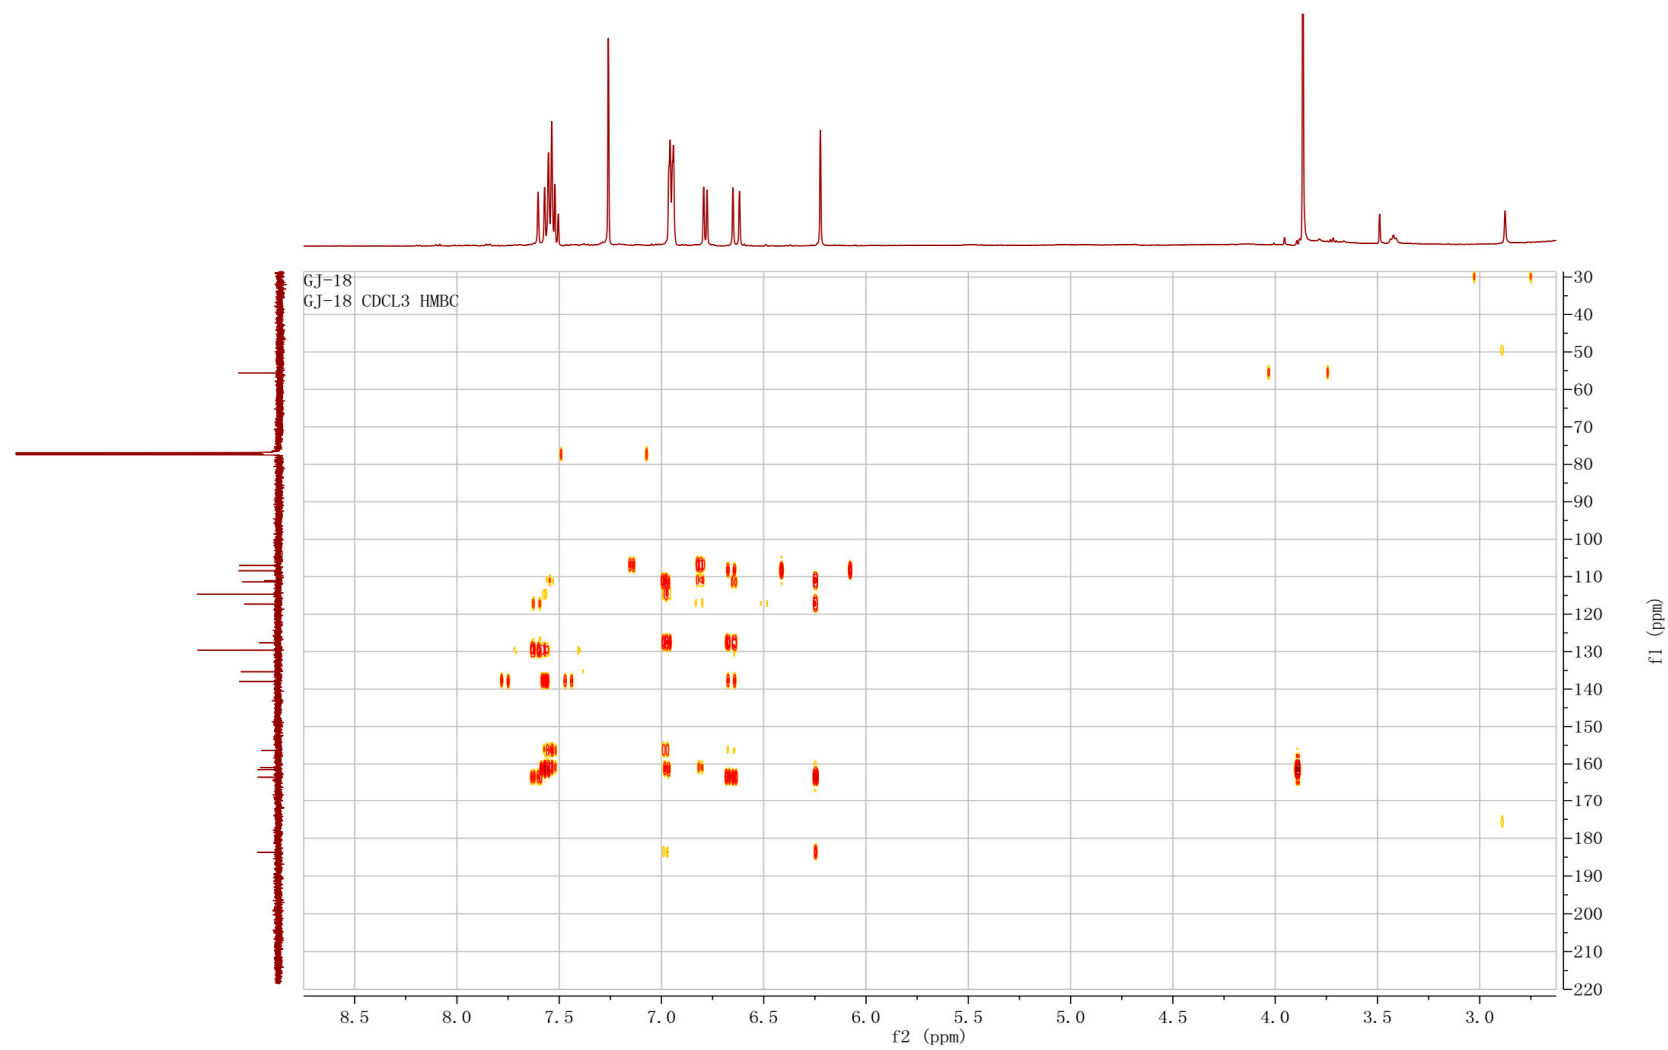

Figure S29. HMBC spectrum (500 MHz) of compound 4 in CDCl<sub>3</sub>.

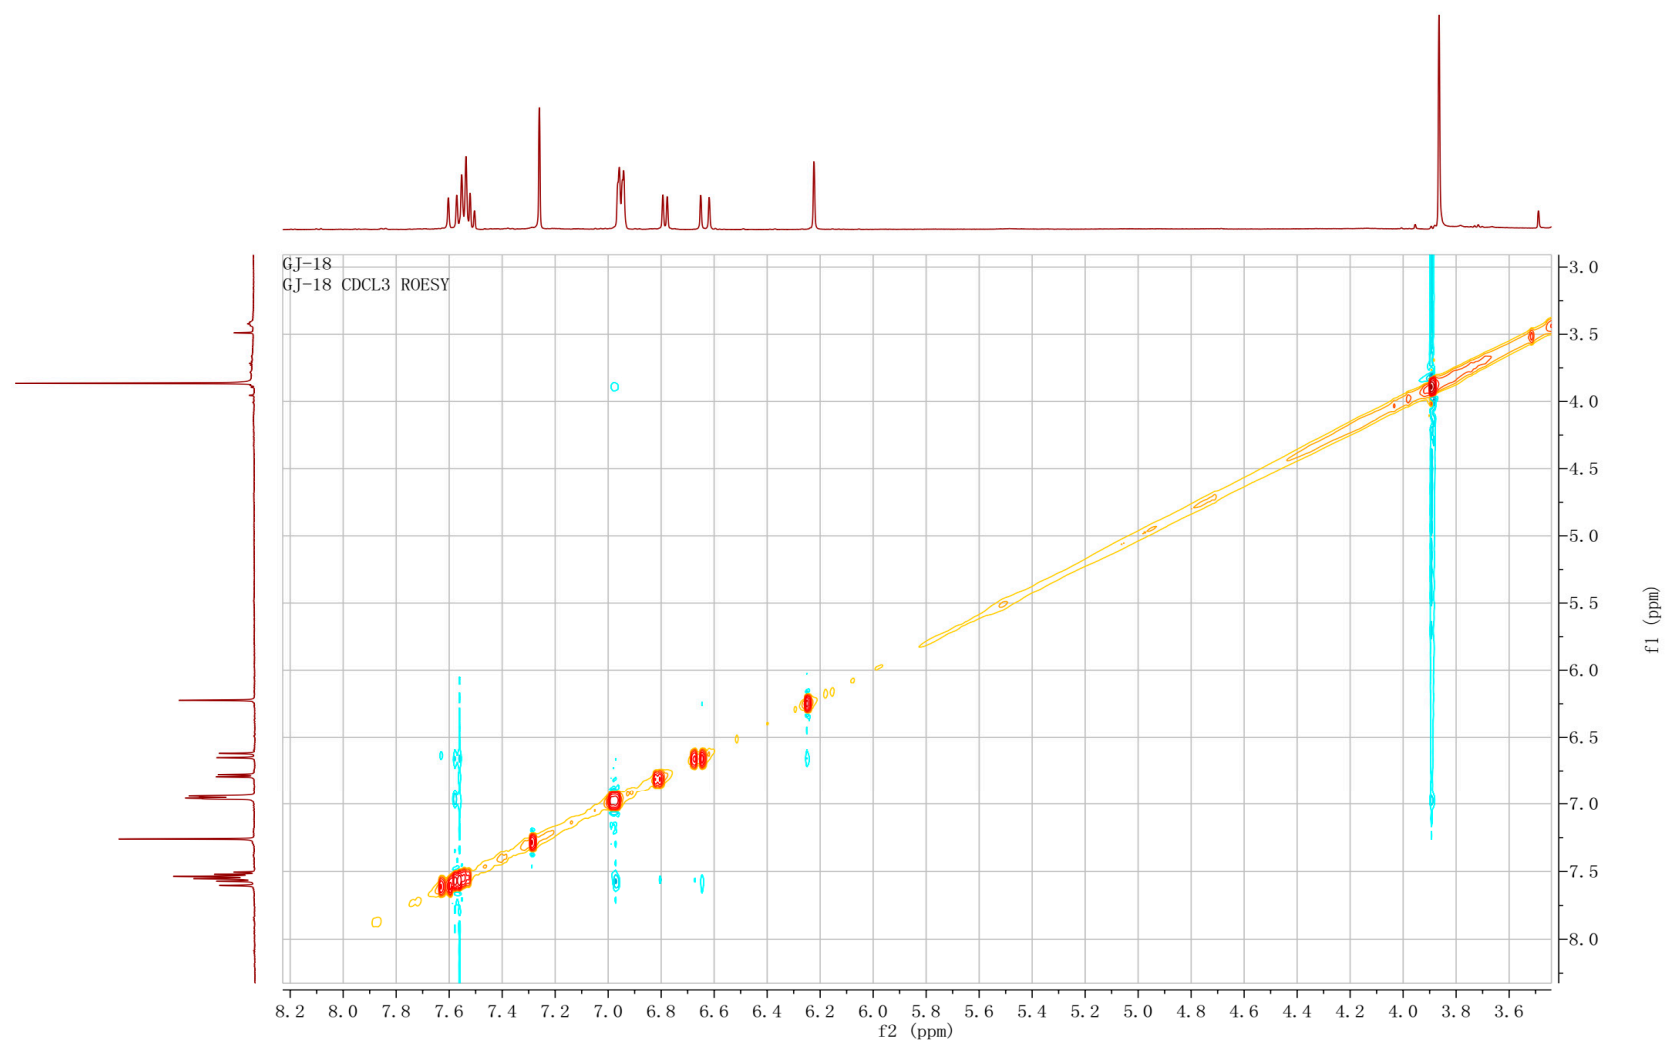

**Figure S30.** ROESY spectrum (400 MHz) of compound **4** in CDCl<sub>3</sub>.

|               |         |             |             |                 |              |                        |                       |
|---------------|---------|-------------|-------------|-----------------|--------------|------------------------|-----------------------|
| Sample Name   | BY-57   | Position    | P1-A9       | Instrument Name | Instrument 1 | User Name              |                       |
| Inj Vol       | 0.1     | InjPosition |             | SampleType      | Sample       | IRM Calibration Status | Success               |
| Data Filename | BY-57-d | ACQ Method  | SIBU-ESI-LM | Comment         |              | Acquired Time          | 12/25/2015 2:42:19 PM |

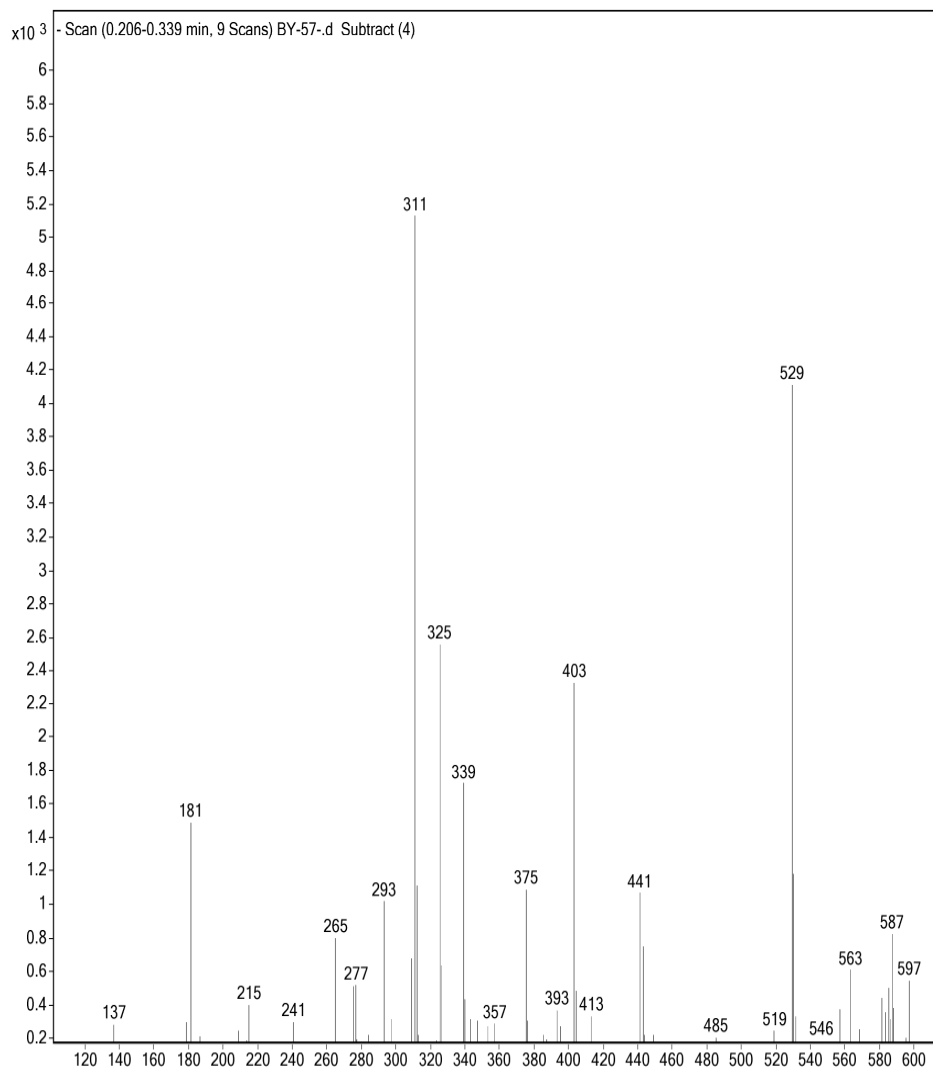

Figure S31. ESI(+)-MS spectrum of compound 4.

## Qualitative Analysis Report

|                               |              |                      |                       |
|-------------------------------|--------------|----------------------|-----------------------|
| <b>Data Filename</b>          | BY-57-.d     | <b>Sample Name</b>   | BY-57                 |
| <b>Sample Type</b>            | Sample       | <b>Position</b>      | P1-A9                 |
| <b>Instrument Name</b>        | Instrument 1 | <b>User Name</b>     |                       |
| <b>Acq Method</b>             | SIBU-ESI-i.m | <b>Acquired Time</b> | 12/25/2015 3:05:43 PM |
| <b>IRM Calibration Status</b> | Success      | <b>DA Method</b>     | ESI+.m                |
| <b>Comment</b>                |              |                      |                       |

|                       |                             |
|-----------------------|-----------------------------|
| <b>Sample Group</b>   | <b>Info.</b>                |
| <b>Acquisition SW</b> | 6200 series TOF/6500 series |
| <b>Version</b>        | Q-TOF B.05.01 (B5125.2)     |

### User Spectra

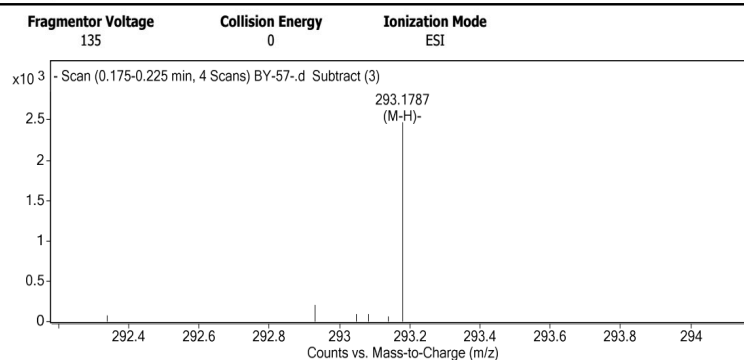

#### Peak List

| m/z      | z | Abund    |
|----------|---|----------|
| 311.1687 | 1 | 5084.09  |
| 325.1844 | 1 | 6385.03  |
| 339.2001 | 1 | 4304.08  |
| 375.2752 | 1 | 4148.44  |
| 403.3066 | 1 | 6881.47  |
| 441.2495 | 1 | 3392.89  |
| 529.2812 | 1 | 12609.48 |
| 530.2839 | 1 | 4065.03  |

#### Formula Calculator Element Limits

| Element | Min | Max |
|---------|-----|-----|
| C       | 3   | 120 |
| H       | 0   | 240 |
| O       | 0   | 60  |
| N       | 0   | 10  |

#### Formula Calculator Results

| Formula                             | CalculatedMass | CalculatedMz | Mz       | Diff. (mDa) | Diff. (ppm) | DBE    |
|-------------------------------------|----------------|--------------|----------|-------------|-------------|--------|
| C <sub>20</sub> H <sub>24</sub> N O | 294.1858       | 293.1785     | 293.1787 | 0.0         | -0.1        | 9.5000 |

--- End Of Report ---

Figure S32. HRESI(+)MS spectrum of compound 4.
